# Supplementary material for: Synthesis, electronic nature, and reactivity of selected silylene carbonyl complexes
Source: Royal Society of Chemistry journal article supplement (doi:10.1039/d2dt01335e), 2022-01-01
Supplement: d2dt01335e1.pdf [file d2dt01335e1.pdf]

## Content

### I. Heteronuclear NMR and IR Spectra

|                                                                                                                                                                                                                                                       |     |
|-------------------------------------------------------------------------------------------------------------------------------------------------------------------------------------------------------------------------------------------------------|-----|
| <b>Figure S1:</b> $^1\text{H}$ NMR spectrum of $\{[\text{L}(\text{I})\text{Ga}]\text{Si}[\text{Ga}(\text{I})][\text{CH}=\text{C}(\text{Me})\text{NAr}][\text{C}(\text{Me})=\text{NAr}]\}$ <b>1</b> in benzene- $d_6$ at room temperature              | S3  |
| <b>Figure S2:</b> $^{13}\text{C}$ NMR spectrum of $\{[\text{L}(\text{I})\text{Ga}]\text{Si}[\text{Ga}(\text{I})][\text{CH}=\text{C}(\text{Me})\text{NAr}][\text{C}(\text{Me})=\text{NAr}]\}$ <b>1</b> in benzene- $d_6$ at room temperature           | S3  |
| <b>Figure S3:</b> $^{13}\text{C}$ (dept135) NMR spectrum of $\{[\text{L}(\text{I})\text{Ga}]\text{Si}[\text{Ga}(\text{I})][\text{CH}=\text{C}(\text{Me})\text{NAr}][\text{C}(\text{Me})=\text{NAr}]\}$ <b>1</b> in benzene- $d_6$ at room temperature | S4  |
| <b>Figure S4:</b> $^{29}\text{Si}$ NMR spectrum of $\{[\text{L}(\text{I})\text{Ga}]\text{Si}[\text{Ga}(\text{I})][\text{CH}=\text{C}(\text{Me})\text{NAr}][\text{C}(\text{Me})=\text{NAr}]\}$ <b>1</b> in benzene- $d_6$ at room temperature.         | S4  |
| <b>Figure S5:</b> ATR-IR spectrum of $\{[\text{L}(\text{I})\text{Ga}]\text{Si}[\text{Ga}(\text{I})][\text{CH}=\text{C}(\text{Me})\text{NAr}][\text{C}(\text{Me})=\text{NAr}]\}$ <b>1</b> .                                                            | S5  |
| <b>Figure S6:</b> $^1\text{H}$ NMR spectrum of $[\text{L}(\text{I})\text{Ga}]_2\text{SiCO}$ <b>2</b> in benzene- $d_6$ at room temperature.                                                                                                           | S5  |
| <b>Figure S7:</b> $^{13}\text{C}$ NMR spectrum of $[\text{L}(\text{I})\text{Ga}]_2\text{SiCO}$ <b>2</b> in benzene- $d_6$ at room temperature.                                                                                                        | S6  |
| <b>Figure S8:</b> $^{13}\text{C}$ (DEPT135) NMR spectrum of $[\text{L}(\text{I})\text{Ga}]_2\text{SiCO}$ <b>2</b> in benzene- $d_6$ at room temperature.                                                                                              | S6  |
| <b>Figure S9:</b> $^{29}\text{Si}$ NMR spectrum of $[\text{L}(\text{I})\text{Ga}]_2\text{SiCO}$ <b>2</b> in benzene- $d_6$ at room temperature.                                                                                                       | S7  |
| <b>Figure S10:</b> ATR-IR spectrum of $[\text{L}(\text{I})\text{Ga}]_2\text{SiCO}$ <b>2</b> .                                                                                                                                                         | S7  |
| <b>Figure S11:</b> $^1\text{H}$ NMR spectrum of $[\text{L}(\text{Me})\text{Ga}]_2\text{SiCO}$ <b>3</b> in benzene- $d_6$ at room temperature.                                                                                                         | S8  |
| <b>Figure S12:</b> $^{13}\text{C}$ NMR spectrum of $[\text{L}(\text{Me})\text{Ga}]_2\text{SiCO}$ <b>3</b> in benzene- $d_6$ at room temperature.                                                                                                      | S8  |
| <b>Figure S13:</b> $^{29}\text{Si}$ NMR spectrum of $[\text{L}(\text{Me})\text{Ga}]_2\text{SiCO}$ <b>3</b> in benzene- $d_6$ at room temperature.                                                                                                     | S9  |
| <b>Figure S14:</b> ATR-IR spectrum of $[\text{L}(\text{Me})\text{Ga}]_2\text{SiCO}$ <b>3</b> .                                                                                                                                                        | S9  |
| <b>Figure S15:</b> $^1\text{H}$ NMR spectrum of $[\text{L}(\text{Br})\text{Ga}]_2\text{Si}(\text{H})\text{NH}_2$ <b>4</b> in benzene- $d_6$ at room temperature.                                                                                      | S10 |
| <b>Figure S16:</b> $^{13}\text{C}$ NMR spectrum of $[\text{L}(\text{Br})\text{Ga}]_2\text{Si}(\text{H})\text{NH}_2$ <b>4</b> in benzene- $d_6$ at room temperature.                                                                                   | S10 |
| <b>Figure S17:</b> $^{29}\text{Si}$ NMR-DEPT90 (119 MHz) spectrum of $[\text{L}(\text{Br})\text{Ga}]_2\text{Si}(\text{H})\text{NH}_2$ <b>4</b> in benzene- $d_6$ at room temperature.                                                                 | S11 |
| <b>Figure S18:</b> $^{29}\text{Si}\{^1\text{H}\}$ NMR DEPT90 (119 MHz) spectrum of $[\text{L}(\text{Br})\text{Ga}]_2\text{Si}(\text{H})\text{NH}_2$ <b>4</b> in benzene- $d_6$ at room temperature.                                                   | S11 |
| <b>Figure S19:</b> ATR-IR spectrum of $[\text{L}(\text{Br})\text{Ga}]_2\text{Si}(\text{H})\text{NH}_2$ <b>4</b> .                                                                                                                                     | S12 |
| <b>Figure S20:</b> In situ $^1\text{H}$ NMR spectra of the reaction of <b>3</b> with $\text{NH}_3$ in benzene- $d_6$ .                                                                                                                                | S12 |
| <b>Figure S21:</b> In situ $^1\text{H}$ NMR spectra of the reaction of <b>3</b> with $\text{H}_2$ in toluene- $d_8$ .                                                                                                                                 | S13 |
| <b>Figure S22:</b> In situ $^1\text{H}$ NMR spectrum of the reaction of <b>1</b> with $\text{SnCl}_4$ in benzene- $d_6$ .                                                                                                                             | S13 |
| <b>Figure S23:</b> In situ $^1\text{H}$ NMR spectrum of the reaction of <b>3</b> with $\text{SnCl}_4$ in benzene- $d_6$ .                                                                                                                             | S14 |

### II. Crystallographic Section

|                                                                                                                                                                                                                                                                                                                                                                                                    |     |
|----------------------------------------------------------------------------------------------------------------------------------------------------------------------------------------------------------------------------------------------------------------------------------------------------------------------------------------------------------------------------------------------------|-----|
| Crystallographic Details                                                                                                                                                                                                                                                                                                                                                                           | S15 |
| <b>Table S1.</b> Crystallographic data of $\{[\text{L}(\text{I})\text{Ga}]\text{Si}[\text{Ga}(\text{I})][\text{CHC}(\text{Me})\text{NAr}][\text{C}(\text{Me})\text{NAr}]\}$ ( <b>1</b> ), $[\text{L}(\text{I})\text{Ga}]_2\text{SiCO}$ ( <b>2</b> ), $[\text{L}(\text{Me})\text{Ga}]_2\text{SiCO}$ ( <b>3</b> ) and $[\text{L}(\text{Br})\text{Ga}]_2\text{Si}(\text{H})\text{NH}_2$ ( <b>4</b> ). | S16 |

### III. Quantum Chemical Calculations

|                                                                                                                                                                                                                                        |     |
|----------------------------------------------------------------------------------------------------------------------------------------------------------------------------------------------------------------------------------------|-----|
| <b>Table S2.</b> Computed NBO charges and selected structural data (at the B3LYP-D3BJ level of theory with the 6-311G(d,p) basis set, and def2-TZVP for Ga, Br, I) for $[\text{L}(\text{R})\text{Ga}]_2\text{Si}-\text{CO}$ complexes. | S17 |
| <b>Table S3.</b> Computed Hirshfeld charges (at the B3LYP-D3BJ level of theory with the 6-311G(d,p) basis set, and def2-TZVP for Ga, Br, I) for $[\text{L}(\text{R})\text{Ga}]_2\text{Si}-\text{CO}$ complexes.                        | S17 |
| <b>Table S4.</b> Field parameters ( $\sigma_{\text{F}}$ ), resonance parameters ( $\sigma_{\text{R}}$ ) and computed $\nu_{\text{CO}}$ values ( $\text{cm}^{-1}$ ) for the different R groups.                                         | S18 |

**Figure S24.** The correlation between  $\nu_{CO}$  and A) Charton's  $\sigma_I$  parameter, B) the resonance  $\sigma_R$  parameter, and C) the  $R^-$  resonance parameter of the various groups. S19

**Figure S25:** Selected molecular orbitals for the different computed derivatives. Colors by elements: C – grey; H – white; Si – beige; Ga – olive green; N – blue; O – red; F – light blue; Cl – green; Br – dark red; I – purple. S20

**IV. Cartesian Coordinates** S21-S30

**V. References** S31

## I. Heteronuclear NMR and IR Spectra

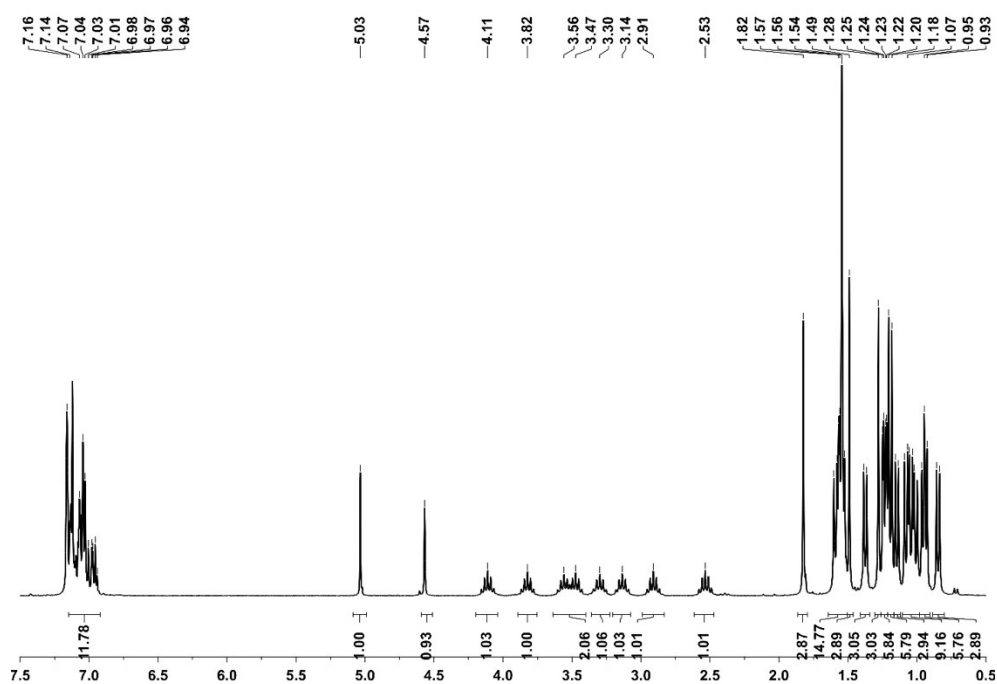

**Figure S1:** <sup>1</sup>H NMR spectrum of  $\{[L(I)Ga]Si[Ga(I)][CH=C(Me)NAr][C(Me)=NAr]\}$  **1** in benzene-*d*<sub>6</sub> at room temperature.

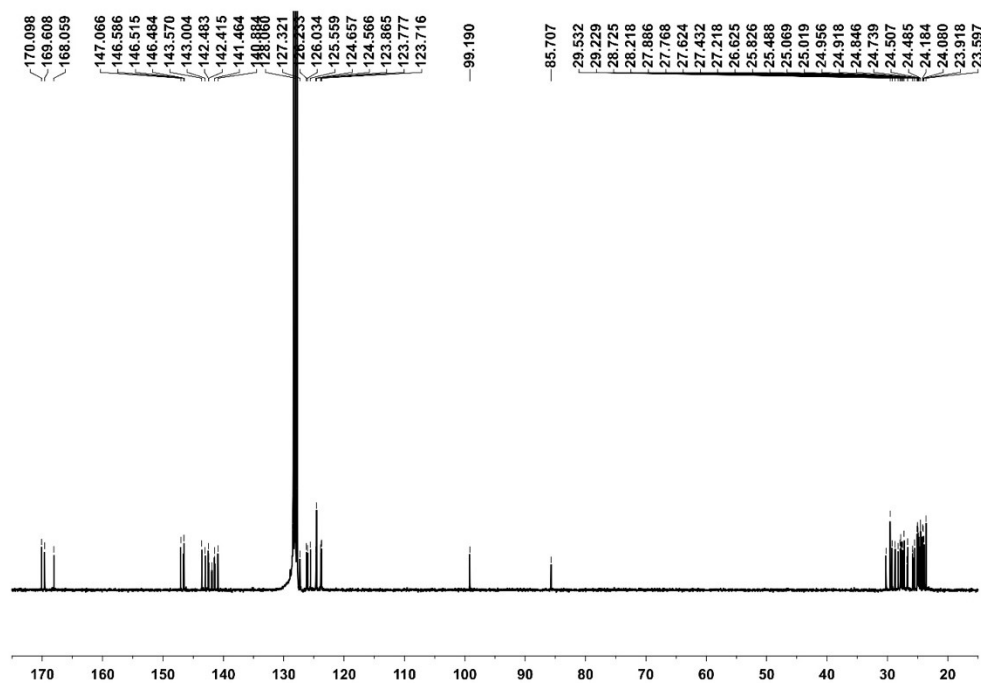

**Figure S2:** <sup>13</sup>C NMR spectrum of  $\{[L(I)Ga]Si[Ga(I)][CH=C(Me)NAr][C(Me)=NAr]\}$  **1** in benzene-*d*<sub>6</sub> at room temperature.

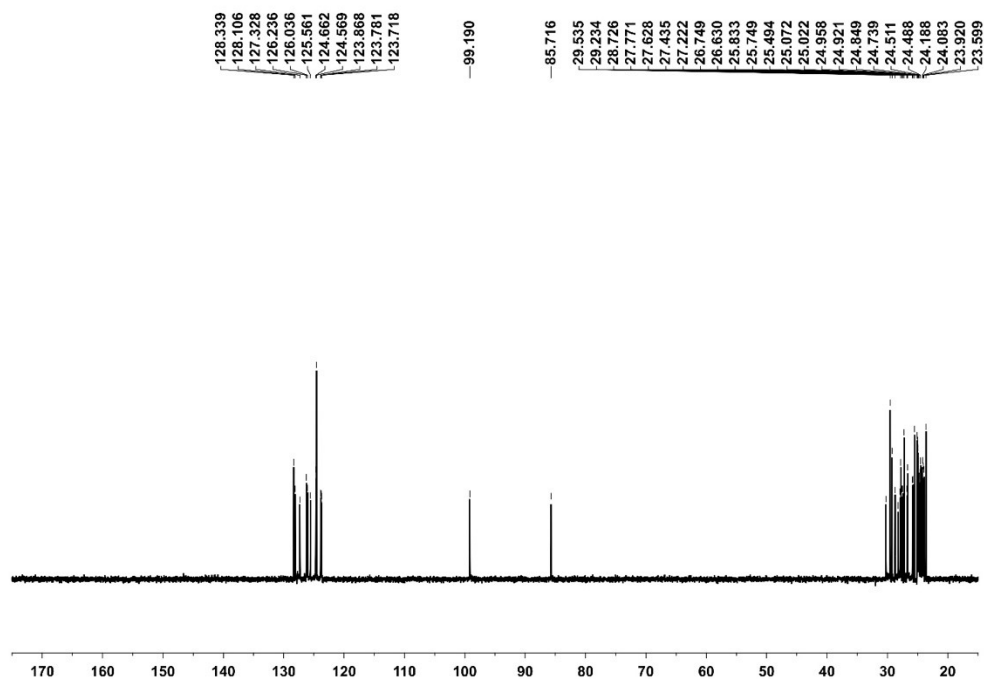

**Figure S3:**  $^{13}\text{C}$  (DEPT135) NMR spectrum of  $\{[\text{L}(\text{I})\text{Ga}]\text{Si}[\text{Ga}(\text{I})][\text{CH}=\text{C}(\text{Me})\text{NAr}][\text{C}(\text{Me})=\text{NAr}]\}$  **1** in benzene- $d_6$  at room temperature.

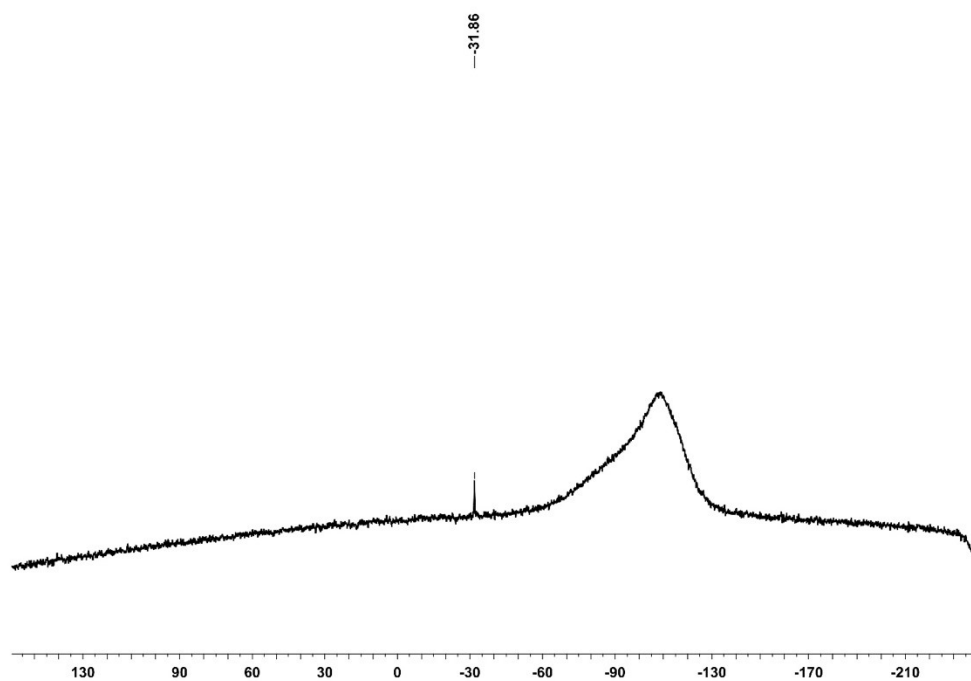

**Figure S4:**  $^{29}\text{Si}$  NMR spectrum of  $\{[\text{L}(\text{I})\text{Ga}]\text{Si}[\text{Ga}(\text{I})][\text{CH}=\text{C}(\text{Me})\text{NAr}][\text{C}(\text{Me})=\text{NAr}]\}$  **1** in benzene- $d_6$  at room temperature.

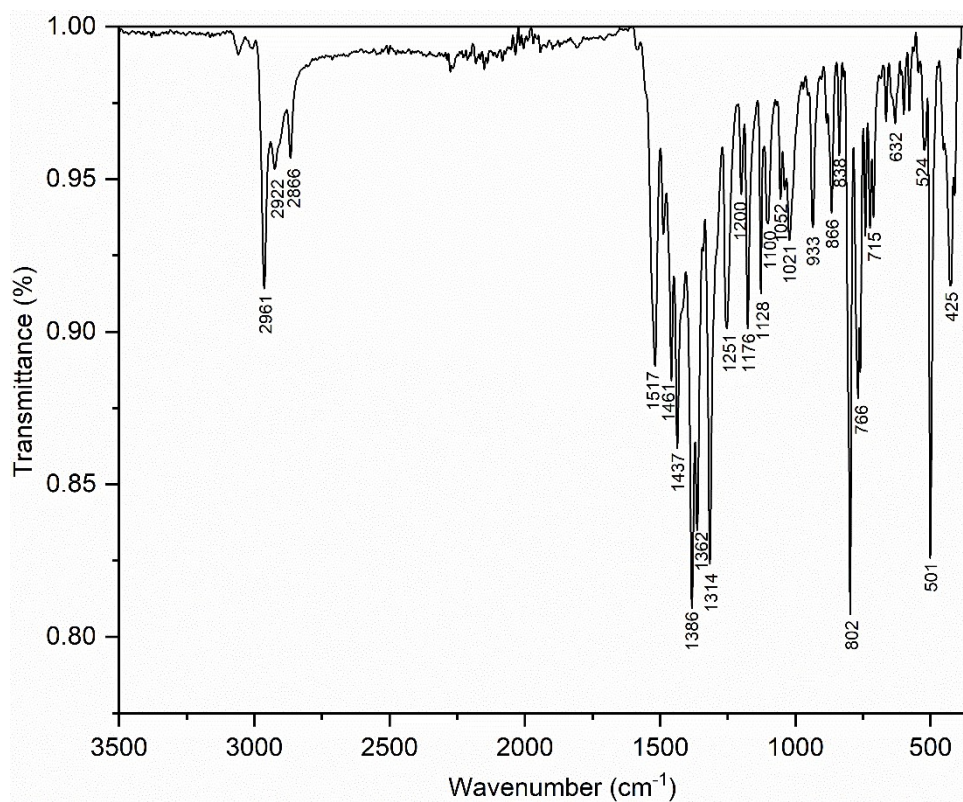

**Figure S5:** ATR-IR spectrum of  $\{[L(I)Ga]Si[Ga(I)]\}[CH=C(Me)NAr][C(Me)=NAr]\}$  **1**.

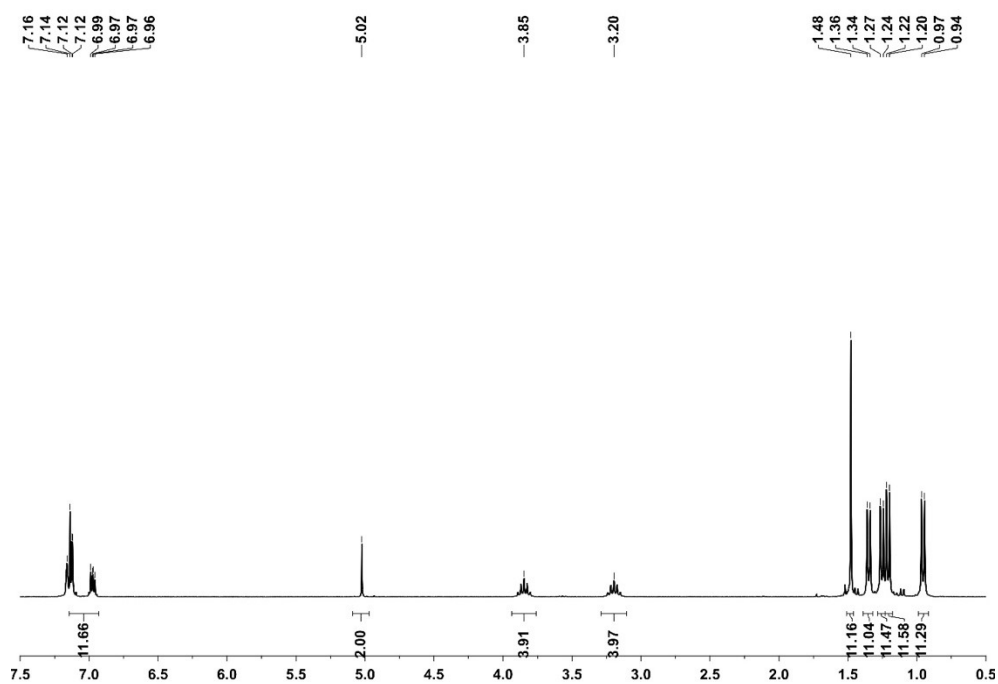

**Figure S6:**  $^1H$  NMR spectrum of  $[L(I)Ga]_2SiCO$  **2** in benzene- $d_6$  at room temperature.

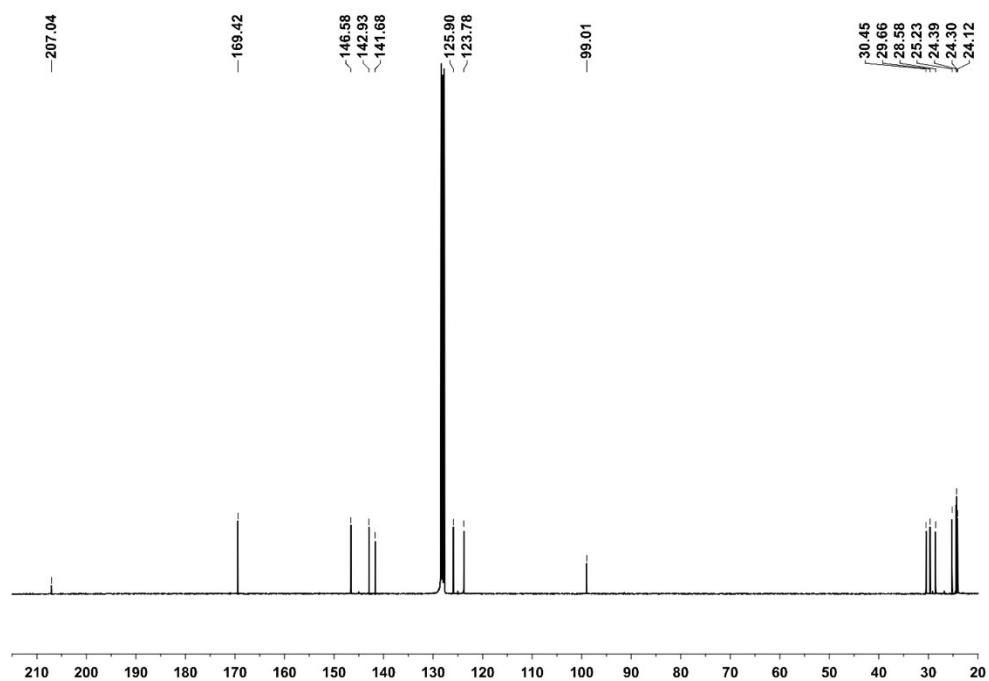

**Figure S7:**  $^{13}\text{C}$  NMR spectrum of  $[\text{L(I)Ga}]_2\text{SiCO 2}$  in benzene- $d_6$  at room temperature.

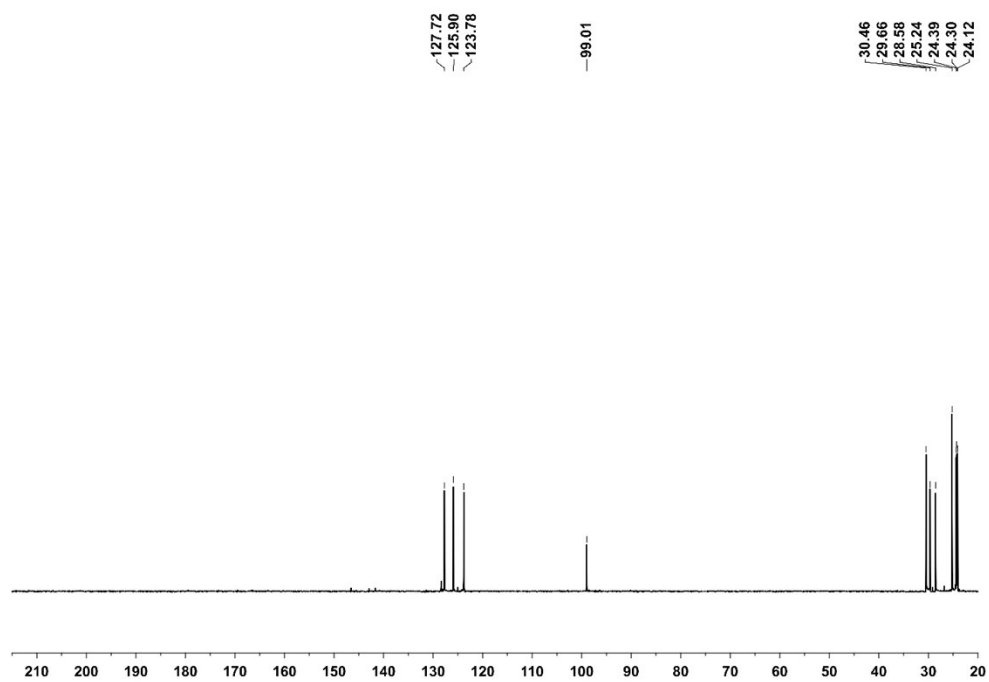

**Figure S8:**  $^{13}\text{C}$  (DEPT135) NMR spectrum of  $[\text{L(I)Ga}]_2\text{SiCO 2}$  in benzene- $d_6$  at room temperature.

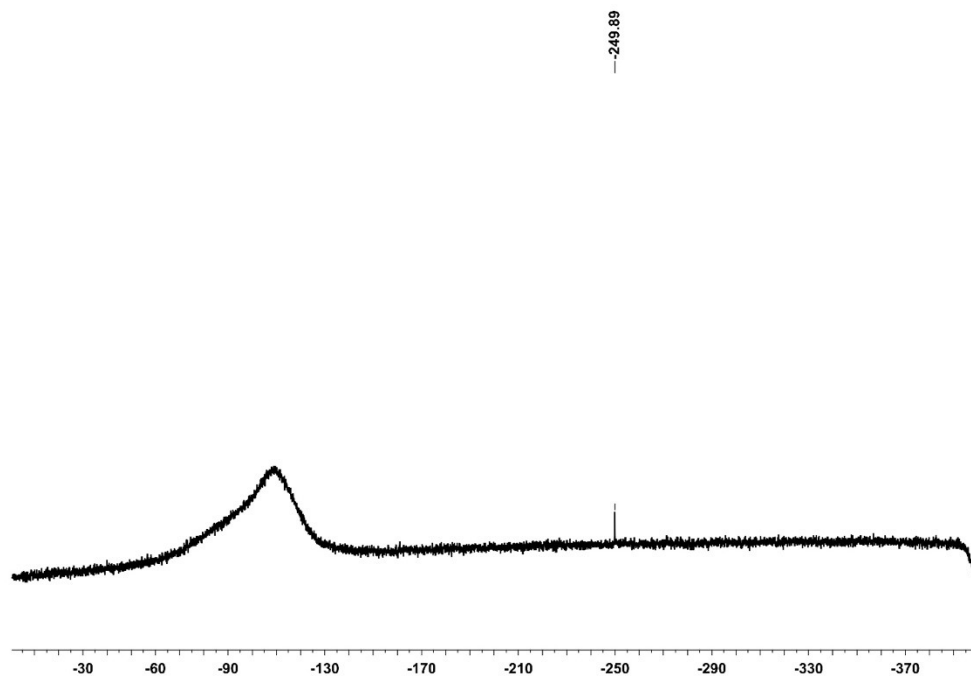

**Figure S9:**  $^{29}\text{Si}$  NMR spectrum of  $[\text{L}(\text{I})\text{Ga}]_2\text{SiCO 2}$  in benzene- $d_6$  at room temperature.

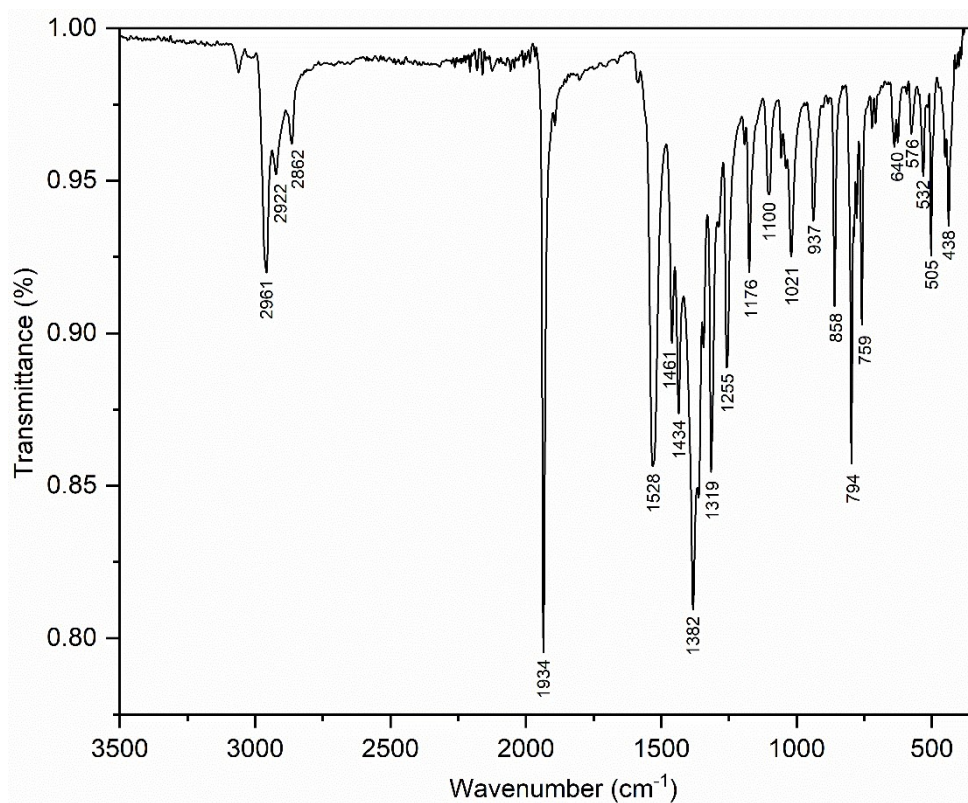

**Figure 10:** ATR-IR spectrum of  $[\text{L}(\text{I})\text{Ga}]_2\text{SiCO 2}$ .

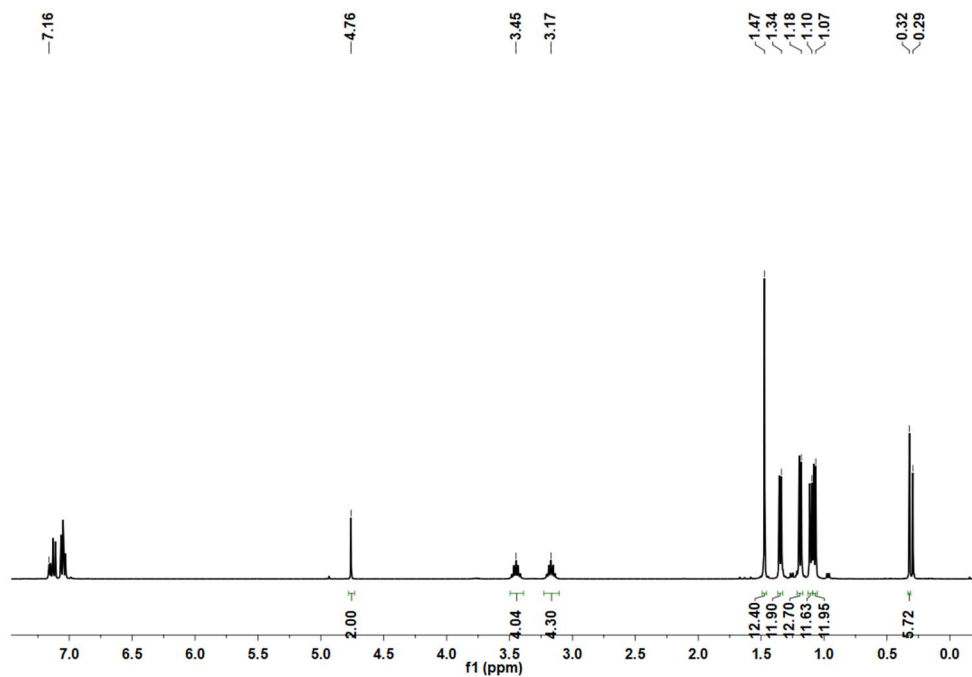

Figure S11:  $^1\text{H}$  NMR spectrum of  $[\text{L}(\text{Me})\text{Ga}]_2\text{SiCO}$  **3** in benzene- $d_6$  at room temperature.

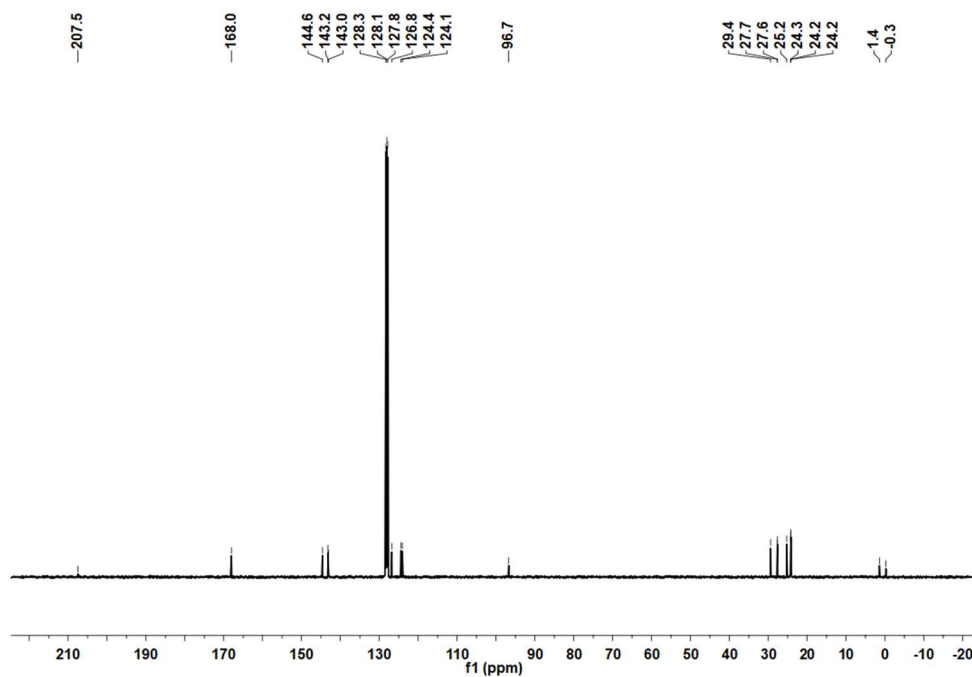

Figure S12:  $^{13}\text{C}$  NMR spectrum of  $[\text{L}(\text{Me})\text{Ga}]_2\text{SiCO}$  **3** in benzene- $d_6$  at room temperature.



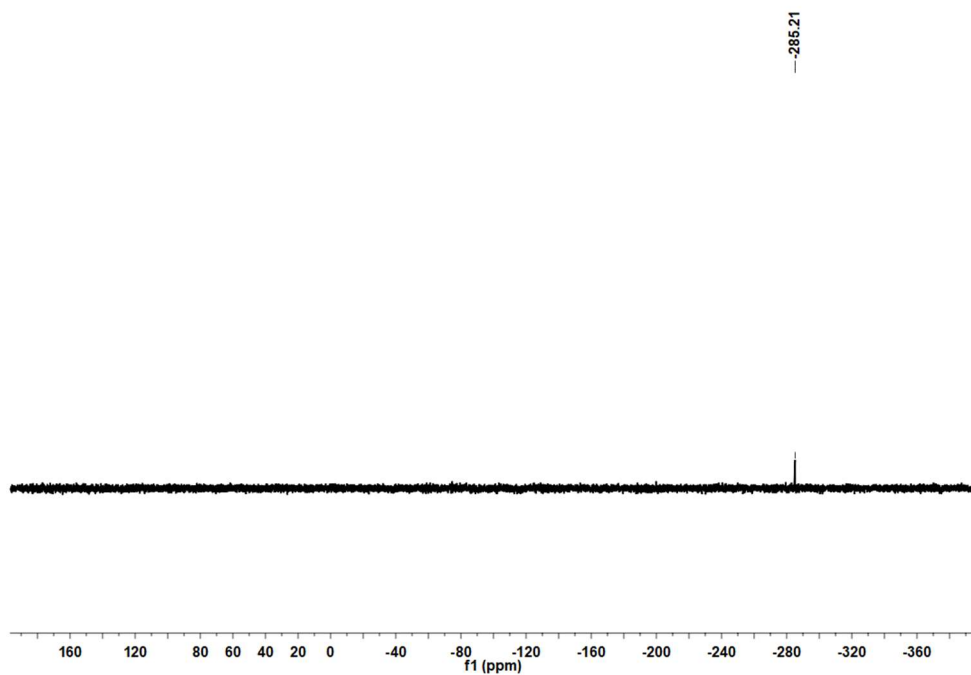

**Figure S13:**  $^{29}\text{Si}$  NMR spectrum of  $[\text{L}(\text{Me})\text{Ga}]_2\text{SiCO}$  **3** in benzene- $d_6$  at room temperature.

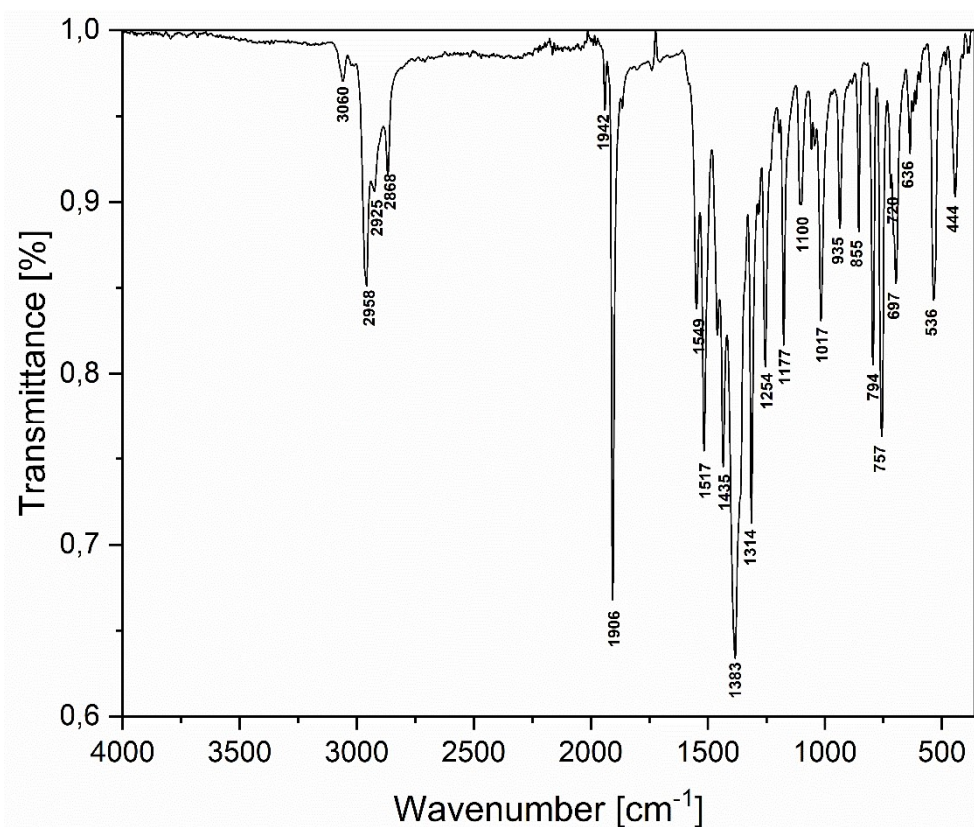

**Figure S14:** ATR-IR spectrum of  $[\text{L}(\text{Me})\text{Ga}]_2\text{SiCO}$  **3**.

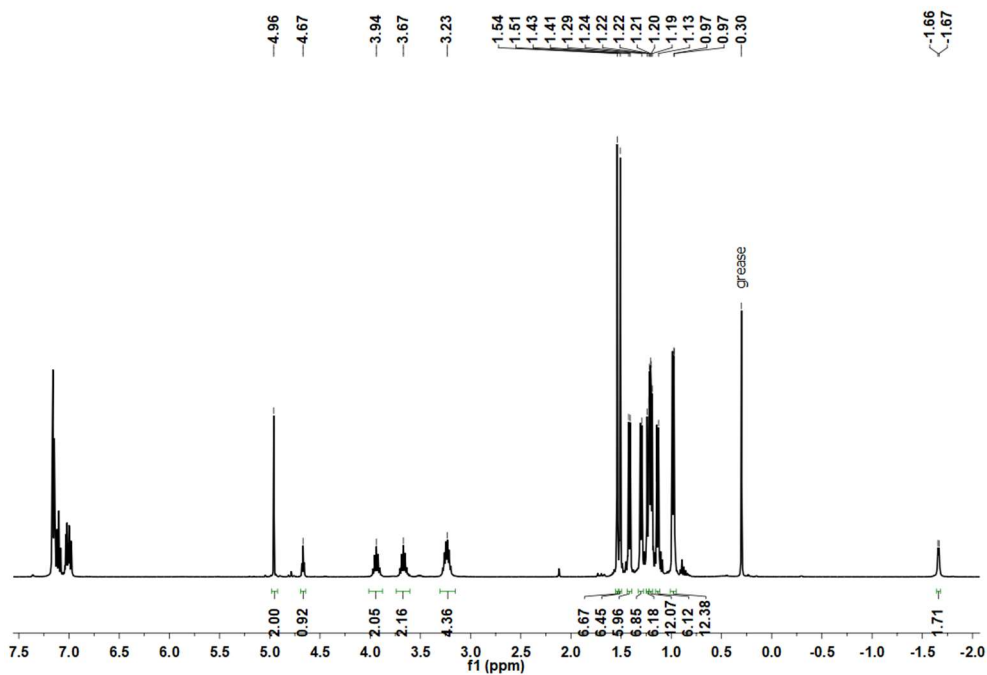

Figure S15:  $^1\text{H}$  NMR spectrum of  $[\text{L}(\text{Br})\text{Ga}]_2\text{Si}(\text{H})\text{NH}_2$  **4** in benzene- $d_6$  at room temperature.

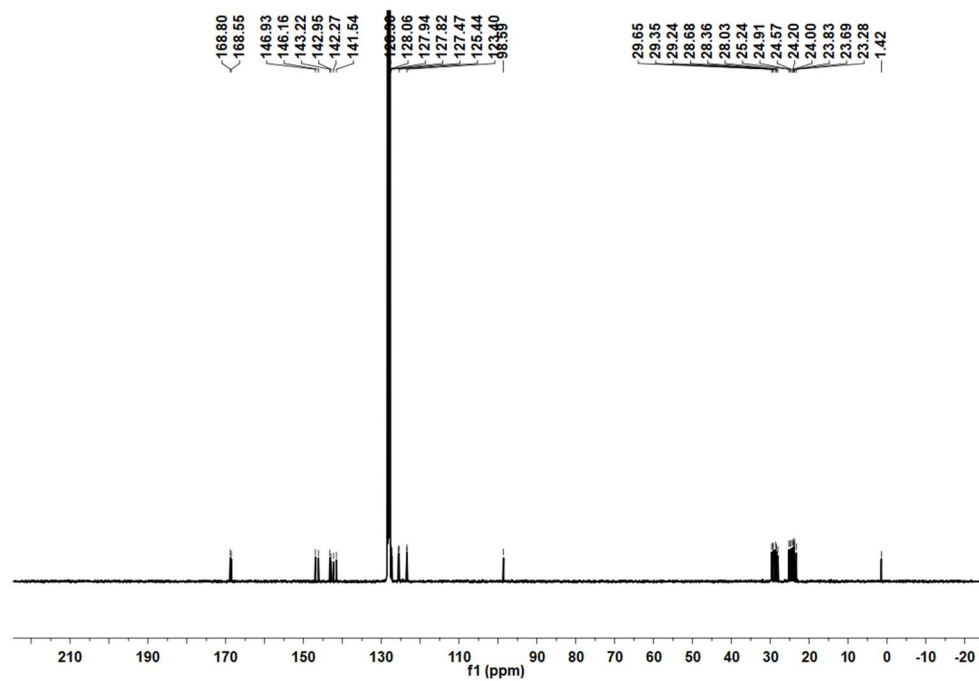

Figure S16:  $^{13}\text{C}$  NMR spectrum of  $[\text{L}(\text{Br})\text{Ga}]_2\text{Si}(\text{H})\text{NH}_2$  **4** in benzene- $d_6$  at room temperature.

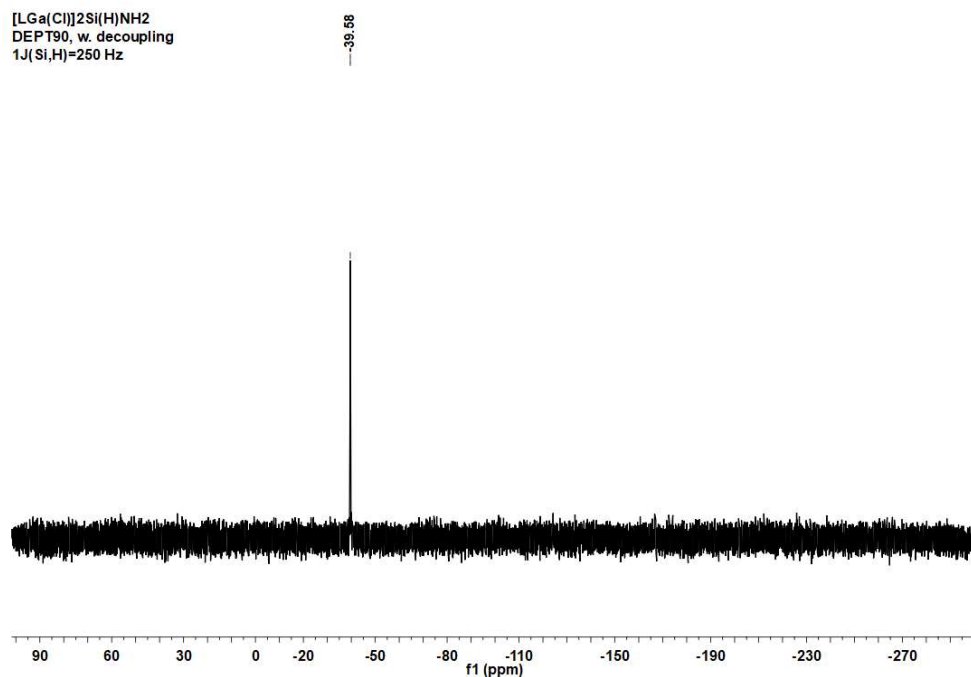

**Figure S17:** <sup>29</sup>Si NMR-DEPT90 (119 MHz) spectrum of [L(Br)Ga]<sub>2</sub>Si(H)NH<sub>2</sub> **4** in benzene-*d*<sub>6</sub> at room temperature.

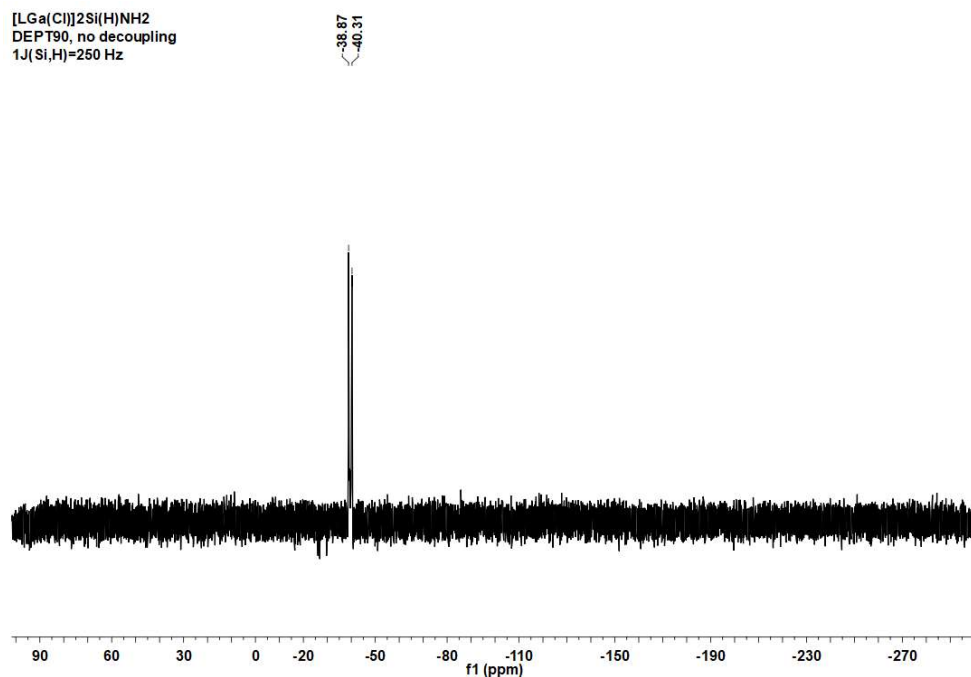

**Figure S18:** <sup>29</sup>Si{<sup>1</sup>H} NMR DEPT90 (119 MHz) spectrum of [L(Br)Ga]<sub>2</sub>Si(H)NH<sub>2</sub> **4** in benzene-*d*<sub>6</sub> at room temperature.

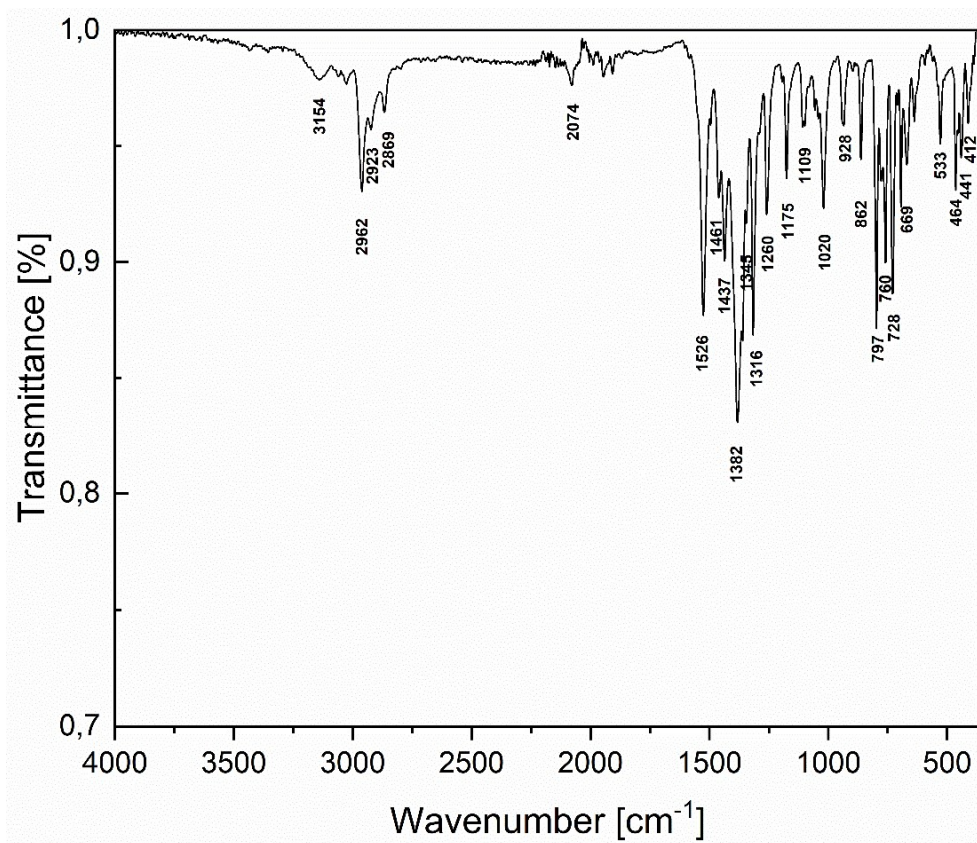

Figure S19: ATR-IR spectrum of  $[\text{L}(\text{Br})\text{Ga}]_2\text{Si}(\text{H})\text{NH}_2$  **4**.

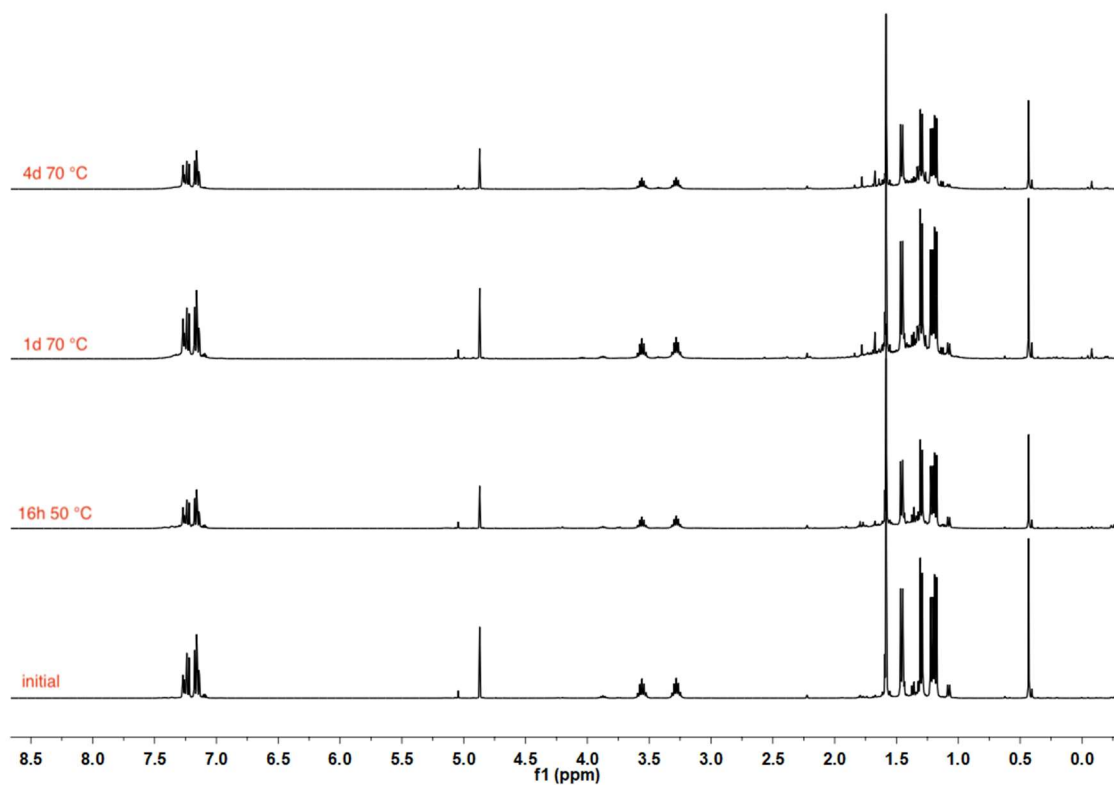

Figure S20: In situ  $^1\text{H}$  NMR spectra of the reaction of **3** with  $\text{NH}_3$  in benzene- $d_6$ .

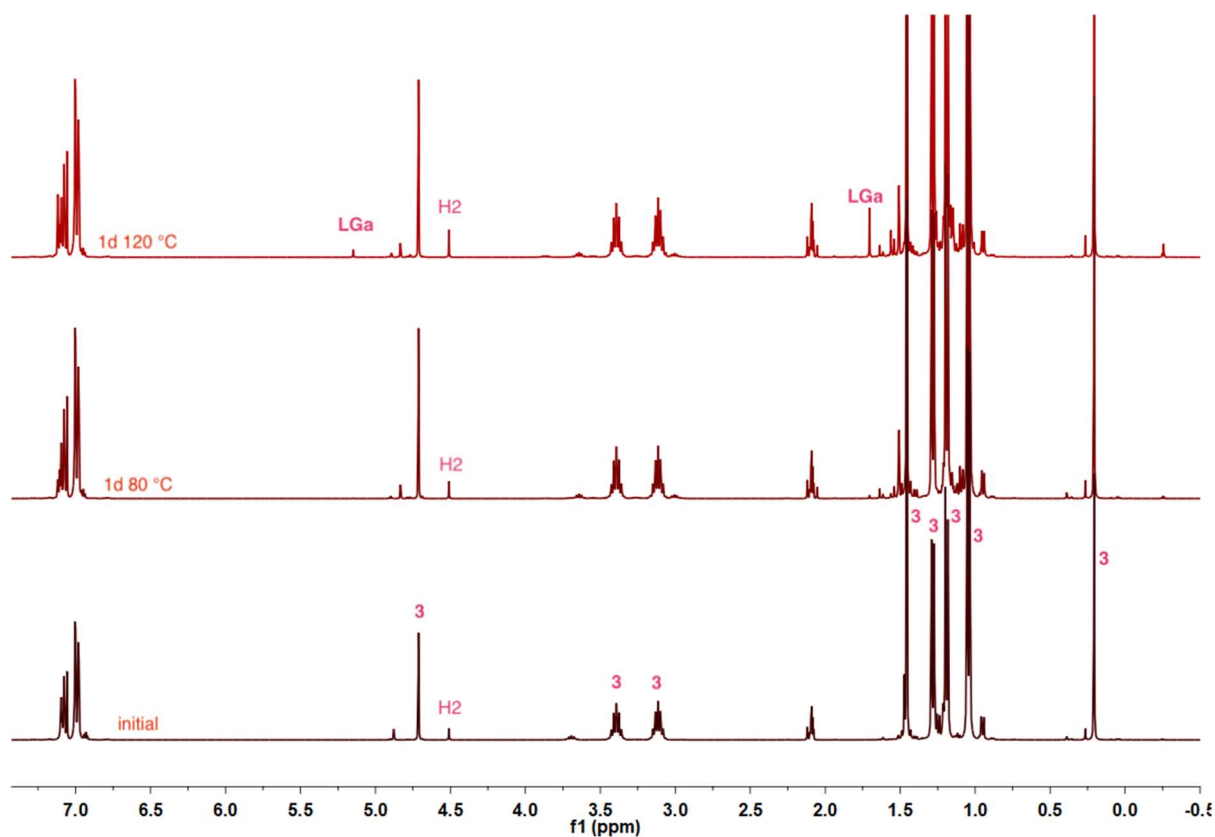

**Figure S21:** In situ  $^1\text{H}$  NMR spectra of the reaction of **3** with  $\text{H}_2$  in  $\text{toluene-}d_8$ .

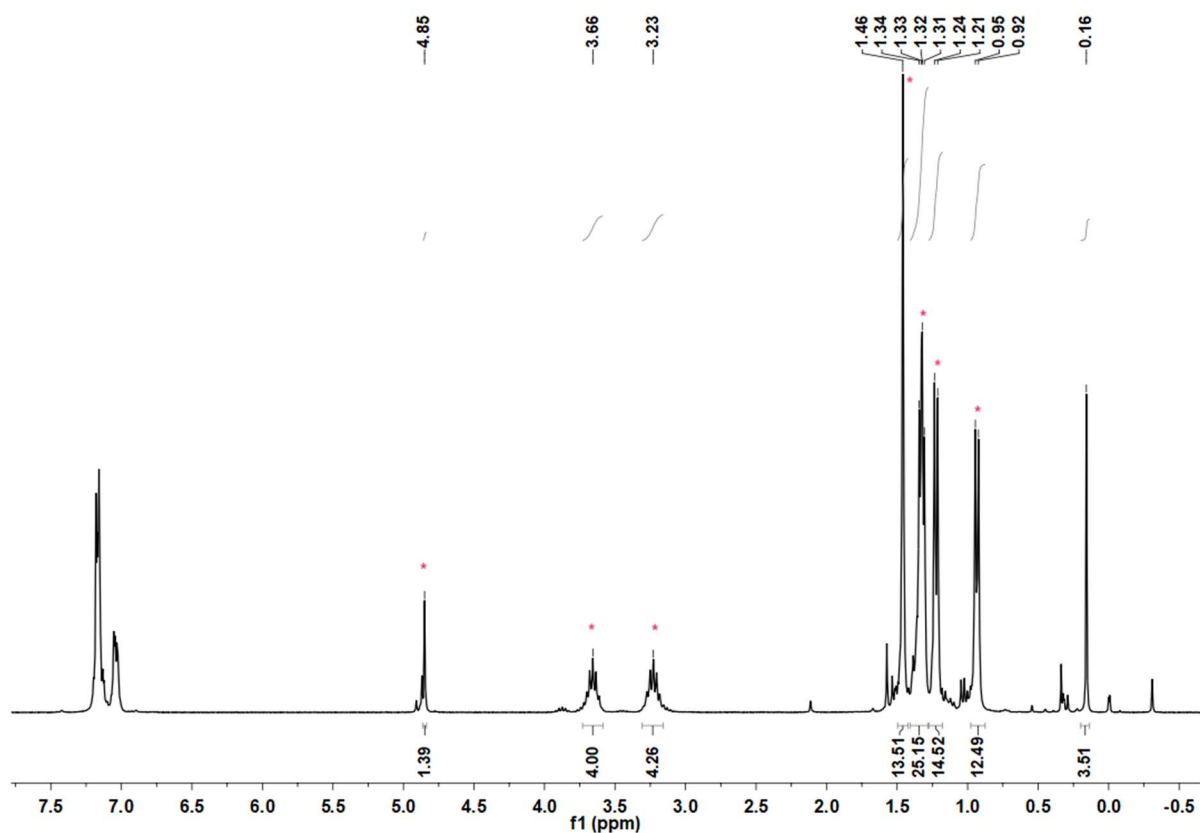

**Figure S22:** In situ  $^1\text{H}$  NMR spectrum of the reaction of **I** with  $\text{SnCl}_4$  in  $\text{benzene-}d_6$ . Resonances due to  $[\text{L}(\text{Cl})\text{Ga}]_2\text{SiCl}_2$  are marked (\*).

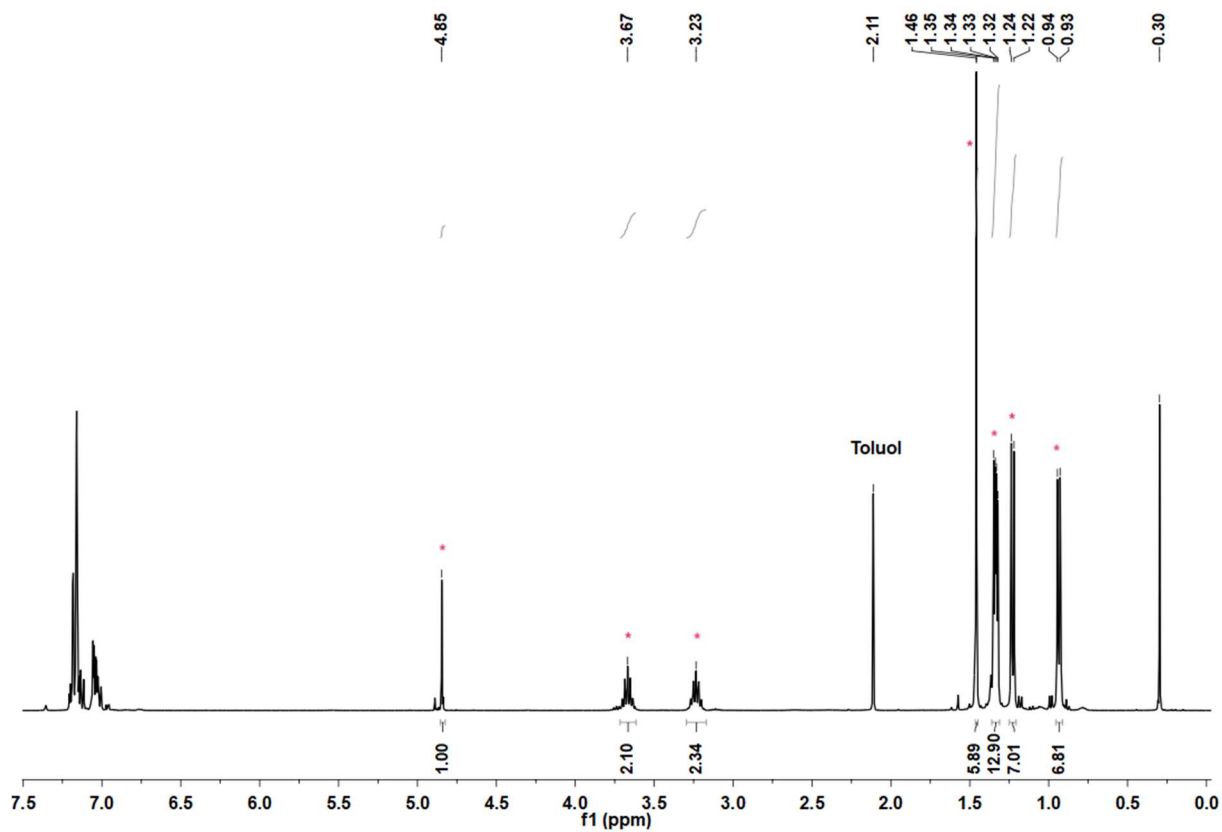

**Figure S23:** In situ  $^1\text{H}$  NMR spectrum of the reaction of **3** with  $\text{SnCl}_4$  in benzene- $d_6$ . Resonances due to  $[\text{L}(\text{Cl})\text{Ga}]_2\text{SiCl}_2$  are marked (\*).

## II. Crystallographic Section

The crystals were mounted on nylon loops in inert oil. Data **1** and **2** were collected on a Bruker AXS D8 Kappa diffractometer with APEX2 detector (mono-chromated Mo $_{K\alpha}$  radiation,  $\lambda = 0.71073 \text{ \AA}$ ) those of **3** and **4** on a Bruker AXS D8 Venture diffractometer with Photon II detector (mono-chromated Cu $_{K\alpha}$  radiation,  $\lambda = 1.54178 \text{ \AA}$ , microfocus source) at 100(2) K. The structures were solved by Direct Methods (SHELXS-97)<sup>[5]</sup> and refined anisotropically by full-matrix least-squares on  $F^2$  (SHELXL-2017)<sup>[6,7]</sup>. Absorption corrections were performed semi-empirically from equivalent reflections on basis of multi-scans (Bruker AXS APEX3). Hydrogen atoms were refined using a riding model or rigid methyl groups. An isopropyl group in **3** is disordered over two positions. All corresponding bond lengths and angles were restrained to be equal (SADI), however since the smaller component is only occupied by about 10% its bond length are not very realistic. Forcing this with DFIX restraints results in significantly worse values for the displacement parameters and the other restraints becoming disagreeable. RIGU, SIMU and ISOR restraints were applied to the anisotropic displacement parameters of the smaller component's atoms. In **4** the molecule is disordered over a two-fold rotational axis. The corresponding atoms of the phenyl ring were restrained to lie on a mutual plane (FLAT). The anisotropic displacement parameters of the atoms and those of the bonded isopropyl group were restrained with RIGU. To overcome correlations ISOR restraints ( $\sigma$  0.01) were applied to the anisotropic displacement parameters of C6 and C6'. Space group *Cc* was tried but the disorder still prevails.

CCDC-2144415 (**1**), -2144416 (**2**), -2144417 (**3**), and -2144418 (**4**) contain the supplementary crystallographic data for this paper. These data can be obtained free of charge from The Cambridge Crystallographic Data Centre via [www.ccdc.cam.ac.uk/data\\_request/cif](http://www.ccdc.cam.ac.uk/data_request/cif).

**Table S1.** Crystallographic data of {[L(I)Ga]Si[Ga(I)][CHC(Me)NAr][C(Me)NAr]} (**1**), [L(I)Ga]<sub>2</sub>SiCO (**2**), [L(Me)Ga]<sub>2</sub>SiCO (**3**) and [L(Br)Ga]<sub>2</sub>Si(H)NH<sub>2</sub> (**4**).

| Identification code                                 | <b>1</b>                                                                         | <b>2</b>                                                                          | <b>3</b>                                                           | <b>4</b>                                                                          |
|-----------------------------------------------------|----------------------------------------------------------------------------------|-----------------------------------------------------------------------------------|--------------------------------------------------------------------|-----------------------------------------------------------------------------------|
| Empirical formula                                   | C <sub>64</sub> H <sub>88</sub> Ga <sub>2</sub> I <sub>2</sub> N <sub>4</sub> Si | C <sub>62</sub> H <sub>85</sub> Ga <sub>2</sub> I <sub>2</sub> N <sub>4</sub> OSi | C <sub>61</sub> H <sub>88</sub> Ga <sub>2</sub> N <sub>4</sub> OSi | C <sub>58</sub> H <sub>85</sub> Br <sub>2</sub> Ga <sub>2</sub> N <sub>5</sub> Si |
| <i>M</i>                                            | 1334.71                                                                          | 1323.67                                                                           | 1060.88                                                            | 1179.65                                                                           |
| Crystal size [mm]                                   | 0.175 × 0.095 × 0.083                                                            | 0.120 × 0.100 × 0.080                                                             | 0.253 × 0.235 × 0.154                                              | 0.309 × 0.148 × 0.111                                                             |
| <i>T</i> [K]                                        | 100(2)                                                                           | 100(2)                                                                            | 100(2)                                                             | 100(2)                                                                            |
| Crystal system                                      | triclinic                                                                        | triclinic                                                                         | triclinic                                                          | monoclinic                                                                        |
| Space group                                         | <i>P</i> -1                                                                      | <i>P</i> -1                                                                       | <i>P</i> -1                                                        | <i>C</i> 2/ <i>c</i>                                                              |
| <i>a</i> [Å]                                        | 12.1170(4)                                                                       | 10.8429(18)                                                                       | 11.8953(3)                                                         | 23.796(3)                                                                         |
| <i>b</i> [Å]                                        | 12.5132(4)                                                                       | 14.778(3)                                                                         | 13.8148(3)                                                         | 10.9213(12)                                                                       |
| <i>c</i> [Å]                                        | 22.6085(7)                                                                       | 20.517(4)                                                                         | 19.8705(6)                                                         | 23.597(3)                                                                         |
| $\alpha$ [°]                                        | 87.712(2)                                                                        | 84.024(10)                                                                        | 79.3889(14)                                                        | 90                                                                                |
| $\beta$ [°]                                         | 81.221(2)                                                                        | 77.522(9)                                                                         | 84.2512(15)                                                        | 99.872(3)                                                                         |
| $\gamma$ [°]                                        | 68.836(2)                                                                        | 77.605(9)                                                                         | 66.0199(13)                                                        | 90                                                                                |
| <i>V</i> [Å <sup>3</sup> ]                          | 3158.86(18)                                                                      | 3129.4(10)                                                                        | 2931.32(14)                                                        | 6041.8(11)                                                                        |
| <i>Z</i>                                            | 2                                                                                | 2                                                                                 | 2                                                                  | 4                                                                                 |
| <i>D</i> <sub>calc</sub> [g·cm <sup>-3</sup> ]      | 1.403                                                                            | 1.405                                                                             | 1.202                                                              | 1.297                                                                             |
| $\mu$ (MoK $\alpha$ ) [mm <sup>-1</sup> ]           | 1.889                                                                            | 1.908                                                                             | 1.630                                                              | 3.117                                                                             |
| Transmissions                                       | 0.75/0.65                                                                        | 0.75/0.69                                                                         | 0.75/0.64                                                          | 0.75/0.61                                                                         |
| <i>F</i> (000)                                      | 1364                                                                             | 1350                                                                              | 1132                                                               | 2456                                                                              |
| Index ranges                                        | -18 ≤ <i>h</i> ≤ 16                                                              | -13 ≤ <i>h</i> ≤ 16                                                               | -14 ≤ <i>h</i> ≤ 12                                                | -26 ≤ <i>h</i> ≤ 30                                                               |
|                                                     | -19 ≤ <i>k</i> ≤ 17                                                              | -22 ≤ <i>k</i> ≤ 22                                                               | -17 ≤ <i>k</i> ≤ 17                                                | -13 ≤ <i>k</i> ≤ 13                                                               |
|                                                     | -33 ≤ <i>l</i> ≤ 33                                                              | -31 ≤ <i>l</i> ≤ 31                                                               | -25 ≤ <i>l</i> ≤ 25                                                | -30 ≤ <i>l</i> ≤ 30                                                               |
| $\theta_{max}$ [°]                                  | 33.299                                                                           | 33.447                                                                            | 81.691                                                             | 80.635                                                                            |
| Reflections collected                               | 106341                                                                           | 173539                                                                            | 280503                                                             | 89420                                                                             |
| Independent reflections                             | 20663                                                                            | 21878                                                                             | 12804                                                              | 6604                                                                              |
| <i>R</i> <sub>int</sub>                             | 0.0329                                                                           | 0.0645                                                                            | 0.0420                                                             | 0.0540                                                                            |
| Refined parameters                                  | 678                                                                              | 669                                                                               | 674                                                                | 450                                                                               |
| <i>R</i> <sub>1</sub> [ <i>I</i> > 2σ( <i>I</i> )]  | 0.0478                                                                           | 0.0353                                                                            | 0.0291                                                             | 0.0393                                                                            |
| <i>wR</i> <sub>2</sub> [all data]                   | 0.1212                                                                           | 0.0680                                                                            | 0.0775                                                             | 0.0978                                                                            |
| Goof                                                | 1.099                                                                            | 1.002                                                                             | 1.025                                                              | 1.370                                                                             |
| $\Delta\rho_{final}$ (max/min) [e·Å <sup>-3</sup> ] | 2.026/-1.703                                                                     | 1.305/-1.208                                                                      | 0.749/-0.577                                                       | 0.334/-0.526                                                                      |



### III. Quantum Chemical calculations

**Table S2.** Computed NBO charges and selected structural data (at the B3LYP-D3BJ level of theory with the 6-311G(d,p) basis set, and def2-TZVP for Ga, Br, I) for [L(R)Ga]<sub>2</sub>Si:-CO complexes.

| R =                                    | F            | Cl           | Br           | I            | Me           | OMe          | NMe <sub>2</sub> |
|----------------------------------------|--------------|--------------|--------------|--------------|--------------|--------------|------------------|
| Q <sub>Si</sub>                        | -0.388       | -0.307       | -0.295       | -0.281       | -0.330       | -0.334       | -0.331           |
| Q <sub>Ga1</sub>                       | 1.561        | 1.326        | 1.246        | 1.136        | 1.402        | 1.546        | 1.500            |
| Q <sub>Ga2</sub>                       | 1.555        | 1.323        | 1.244        | 1.137        | 1.400        | 1.540        | 1.484            |
| Q <sub>R1</sub>                        | -0.712       | -0.544       | -0.473       | -0.370       | -1.203       | -0.963       | -0.966           |
| Q <sub>R2</sub>                        | -0.713       | -0.546       | -0.476       | -0.373       | -1.202       | -0.959       | -0.962           |
| Q <sub>C</sub>                         | 0.256        | 0.263        | 0.265        | 0.266        | 0.242        | 0.253        | 0.236            |
| Q <sub>O</sub>                         | -0.424       | -0.428       | -0.426       | -0.425       | -0.466       | -0.452       | -0.463           |
| Q <sub>C</sub> + Q <sub>O</sub>        | -0.168       | -0.165       | -0.161       | -0.159       | -0.224       | -0.199       | -0.227           |
| Ga <sup>1</sup> -Si-Ga <sup>2</sup> -R | 25.5         | 26.6         | 25.7         | 25.6         | 52.1         | 60.0         | 63.7             |
| r <sub>O-H</sub> <sup>a</sup>          | 2.79         | 2.42         | 2.44         | 2.46         | 2.35         | 2.35         | 2.39             |
| LP <sub>Si</sub> %s, %p                | 75.83, 24.06 | 75.05, 24.84 | 74.84, 25.05 | 74.73, 25.15 | 74.98, 24.90 | 75.84, 24.04 | 74.25, 25.63     |
| LP <sub>Si</sub> → π* <sub>CO</sub>    | 17.64        | 11.77        | 13.15        | 15.21        | 20.00        | 20.33        | 20.18            |
| σ <sub>Si-Ga</sub> → π* <sub>CO</sub>  | 8.76, 18.09  | 11.16, 13.55 | 10.70, 13.06 | 12.56, 13.30 | 12.09, 14.01 | 12.10, 15.91 | 19.32, 8.67      |

<sup>a</sup> The distance between the carbonyl oxygen and the closest hydrogen of a methyl group (from *i*Pr).

**Table S3.** Computed Hirshfeld charges (at the B3LYP-D3BJ level of theory with the 6-311G(d,p) basis set, and def2-TZVP for Ga, Br, I) for [L(R)Ga]<sub>2</sub>Si:-CO complexes.

| R =                             | F      | Cl     | Br     | I      | Me     | OMe_2nd | NMe <sub>2</sub> _2nd |
|---------------------------------|--------|--------|--------|--------|--------|---------|-----------------------|
| Q <sub>Si</sub>                 | -0.049 | -0.049 | -0.049 | -0.049 | -0.083 | -0.046  | -0.061                |
| Q <sub>Ga1</sub>                | 0.356  | 0.311  | 0.297  | 0.289  | 0.290  | 0.345   | 0.317                 |
| Q <sub>Ga2</sub>                | 0.357  | 0.311  | 0.297  | 0.289  | 0.290  | 0.345   | 0.316                 |
| Q <sub>R1</sub>                 | -0.313 | -0.222 | -0.196 | -0.180 | -0.221 | -0.284  | -0.203                |
| Q <sub>R2</sub>                 | -0.309 | -0.221 | -0.194 | -0.177 | -0.223 | -0.289  | -0.204                |
| Q <sub>C</sub>                  | 0.101  | 0.099  | 0.098  | 0.098  | 0.082  | 0.097   | 0.087                 |
| Q <sub>O</sub>                  | -0.089 | -0.087 | -0.087 | -0.088 | -0.105 | -0.095  | -0.091                |
| Q <sub>C</sub> + Q <sub>O</sub> | 0.012  | 0.012  | 0.011  | 0.010  | -0.023 | 0.002   | -0.004                |

Note that the R groups influence the geometry of the complex. For one of the two R groups in each complex the R<sup>1</sup>-Ga<sup>1</sup>-Si-Ga<sup>2</sup> atoms are roughly on the same plane, but the other R group is on a different plane, as demonstrated by the Ga<sup>1</sup>-Si-Ga<sup>2</sup>-R angle. This dihedral angle is smaller for the halogens and larger for the other groups. As a result, for the halogens the oxygen is “sandwiched” between two aromatic rings, while for the other R groups the oxygen is close to one aromatic ring and to one methyl from the *i*Pr substituents. This is illustrated by the r<sub>O-H</sub> distances, which are shorter than the sum of the vdW radii of hydrogen and oxygen. This can also have an effect on the charge of the oxygen.

## Comparison of $\nu_{\text{CO}}$ values to field/inductive and resonance parameters

**Table S4.** Field parameters ( $\sigma_{\text{F}}$ ), resonance parameters ( $\sigma_{\text{R}}$ ) and computed  $\nu_{\text{CO}}$  values ( $\text{cm}^{-1}$ ) for the different R groups.

|                  | $\nu_{\text{CO}}$ | $\sigma_{\text{F}}^a$ | $\sigma_{\text{I}}$ Charton <sup>b</sup> | $\sigma_{\text{R}}^c$ | $\text{R}^-^d$ |
|------------------|-------------------|-----------------------|------------------------------------------|-----------------------|----------------|
| F                | 1966              | 0.45                  | 0.54                                     | -0.39                 | -0.48          |
| Cl               | 1959              | 0.42                  | 0.47                                     | -0.19                 | -0.23          |
| Br               | 1958              | 0.45                  | 0.47                                     | -0.22                 | -0.2           |
| I                | 1956              | 0.42                  | 0.4                                      | -0.24                 | -0.15          |
| Me               | 1925              | 0.01                  | -0.01                                    | -0.18                 | -0.18          |
| OMe              | 1946              | 0.29                  | 0.3                                      | -0.56                 | -0.55          |
| NMe <sub>2</sub> | 1934              | 0.15                  | 0.17                                     | -0.98                 | -0.27          |

<sup>a</sup>  $\sigma_{\text{F}}$  matches the F parameter presented in Table I of reference [8].

<sup>b</sup> From reference [9].

<sup>c</sup>  $\sigma_{\text{R}}$  matches the R parameter presented in Table I of reference [8].

<sup>d</sup>  $\text{R}^-$  from Table V of reference [8].

Here we show a table with the values of the  $\sigma_{\text{F}}$  field/inductive parameter (Fig. 2 in the main text) and of the  $\sigma_{\text{R}}$  resonance parameter. These match the F and R parameters from table I of reference [8]. The F field parameter is based on  $\text{pK}_{\text{a}}$  values of substituted bicyclo[2.2.2]octane-1-carboxylic acids or of quinuclidinium cations, in which there is no resonance effect possible. Other field/inductive parameters listed in this reference ( $\sigma_{\text{I}}$  and  $\sigma_{\text{F}}$  values computed from different methods or reference reactions) also give good correlations with  $\nu_{\text{CO}}$ . The R resonance parameter is produced by subtracting the (scaled) field effect F parameters from Hammett's  $\sigma_{\text{p}}$  parameter. R, and also other resonance parameters  $\text{R}^+$ ,  $\text{R}^-$ ,  $\sigma_{\text{R}^+}$ ,  $\sigma_{\text{R}^-}$ , do not give clear correlations with  $\nu_{\text{CO}}$ .

We chose to list here also two additional parameters from this reference: Charton's  $\sigma_{\text{I}}$  parameter<sup>[9]</sup> (from Table II) and the  $\text{R}^-$  parameters (from Table V). Charton's  $\sigma_{\text{I}}$  parameter, derived from  $\text{pK}_{\text{a}}$  values of substituted guanidinium cations, shows a good correlation with  $\nu_{\text{CO}}$  (Fig. S24A). The  $\text{R}^-$  parameter is derived from the  $\sigma_{\text{p}}^-$  parameter by subtraction of the field/inductive parameter, such that it describes the conjugation of para substituents on a benzene ring with electron rich centers (phenols). This parameter shows a trend within the halogen series, but not between all groups (Fig. S24).

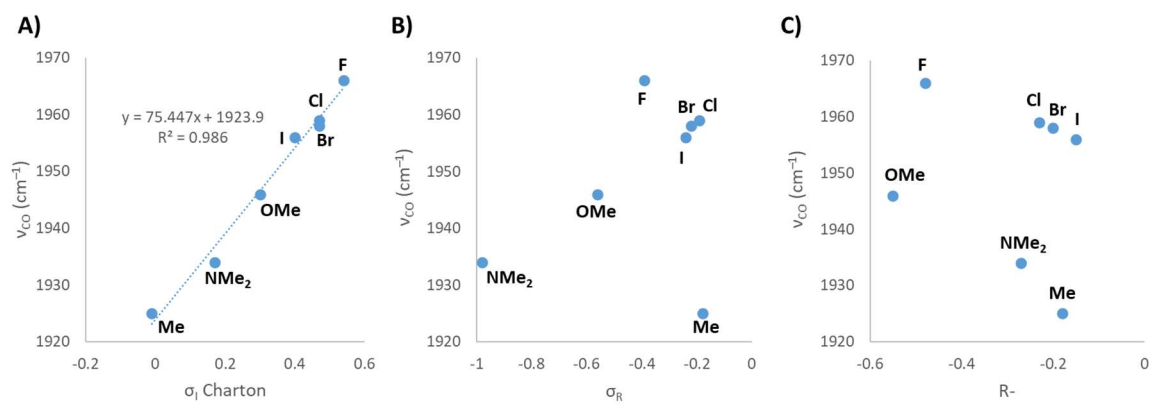

**Figure S24.** The correlation between  $\nu_{\text{CO}}$  and A) Charton's  $\sigma_I$  parameter, B) the resonance  $\sigma_R$  parameter, and C) the  $R^-$  resonance parameter of the various groups.

Selected molecular orbitals

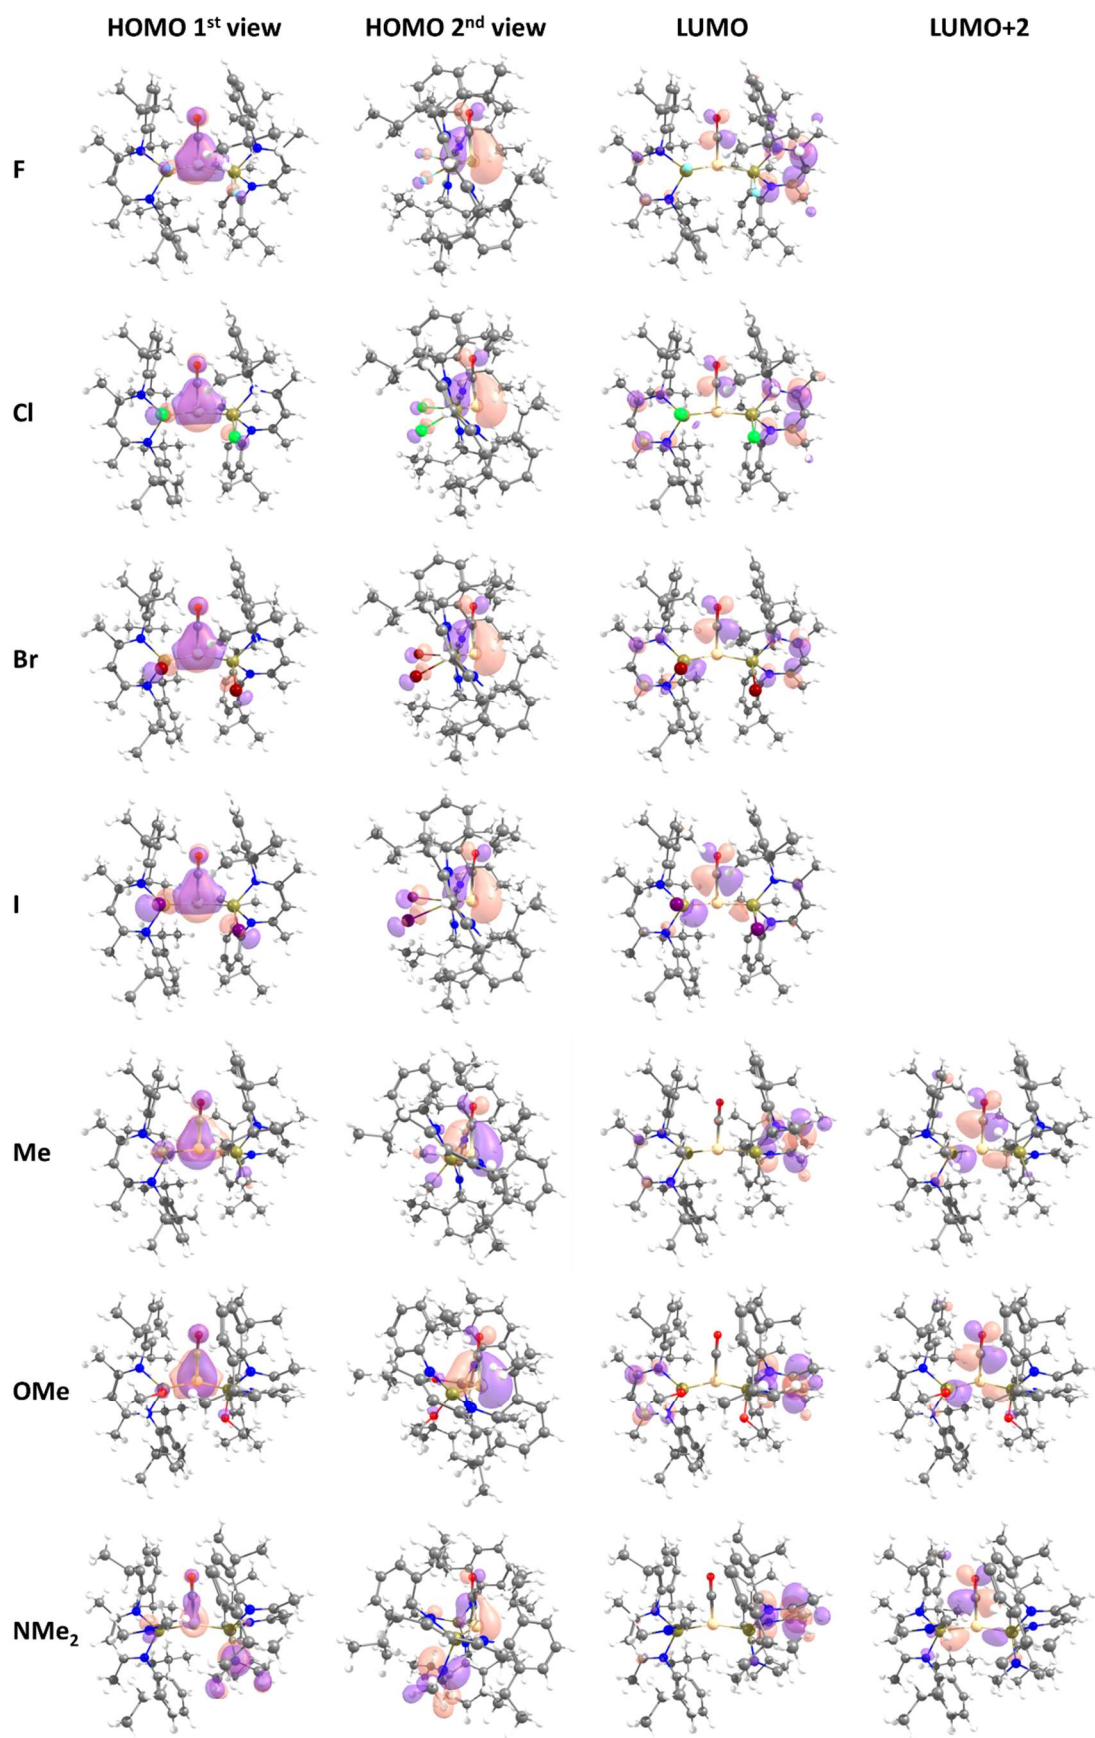

Figure S25: Selected molecular orbitals for the different computed derivatives. Colors by elements: C – grey; H – white; Si – beige; Ga – olive green; N – blue; O – red; F – light blue; Cl – green; Br – dark red; I – purple.

#### IV. Cartesian Coordinates

X = F

Imaginary frequencies: 0

Electronic Energy = -6932.31843751 a.u.

ZPVE correction = 1.289204 a.u.

|    |           |           |           |
|----|-----------|-----------|-----------|
| Ga | 1.977277  | -0.250984 | -0.483527 |
| Ga | -2.025653 | 0.282286  | -0.535721 |
| Si | -0.049611 | -0.042103 | 0.852570  |
| O  | -0.650225 | -2.937034 | 0.779564  |
| N  | 2.934724  | -1.948917 | -0.780286 |
| N  | 3.551735  | 0.655615  | 0.331740  |
| N  | -3.688045 | -0.464404 | 0.247093  |
| N  | -2.734669 | 2.110686  | -0.668767 |
| C  | 4.264401  | -1.999985 | -0.893586 |
| C  | -0.402036 | -1.816735 | 0.707347  |
| C  | 5.120174  | -0.953465 | -0.541730 |
| H  | 6.174007  | -1.131538 | -0.700448 |
| C  | 4.797001  | 0.247527  | 0.107494  |
| C  | 4.912645  | -3.278652 | -1.369207 |
| H  | 4.993337  | -3.993544 | -0.546646 |
| H  | 5.916407  | -3.075849 | -1.740702 |
| H  | 4.324143  | -3.755109 | -2.151693 |
| C  | 5.966142  | 1.098535  | 0.547963  |
| H  | 5.712458  | 1.743022  | 1.386722  |
| H  | 6.277889  | 1.740026  | -0.280093 |
| H  | 6.812396  | 0.467199  | 0.817839  |
| C  | 2.170259  | -3.157993 | -0.906953 |
| C  | 1.443495  | -3.396036 | -2.088130 |
| C  | 0.649362  | -4.543637 | -2.146637 |
| H  | 0.074138  | -4.742635 | -3.042548 |
| C  | 0.586832  | -5.429575 | -1.080428 |
| H  | -0.044113 | -6.308822 | -1.142262 |
| C  | 1.332990  | -5.190215 | 0.066551  |
| H  | 1.273466  | -5.886239 | 0.894446  |
| C  | 2.136836  | -4.056321 | 0.178682  |
| C  | 1.562692  | -2.489948 | -3.305868 |
| H  | 2.128749  | -1.604113 | -3.022149 |
| C  | 0.203412  | -2.002100 | -3.822444 |
| H  | -0.412284 | -2.831629 | -4.183186 |
| H  | 0.356143  | -1.314475 | -4.658446 |
| H  | -0.363429 | -1.466742 | -3.062283 |
| C  | 2.343502  | -3.201541 | -4.425839 |
| H  | 1.812089  | -4.093551 | -4.770558 |
| H  | 3.337181  | -3.513171 | -4.094482 |
| H  | 2.468863  | -2.531910 | -5.281079 |
| C  | 2.919972  | -3.806163 | 1.463537  |
| H  | 3.657425  | -3.027212 | 1.268461  |
| C  | 2.016634  | -3.286419 | 2.595029  |
| H  | 1.580686  | -2.317978 | 2.347779  |
| H  | 2.596314  | -3.164336 | 3.514678  |
| H  | 1.194945  | -3.978514 | 2.794287  |
| C  | 3.687593  | -5.055527 | 1.924443  |
| H  | 3.009777  | -5.843011 | 2.263494  |
| H  | 4.345458  | -4.806365 | 2.761388  |
| H  | 4.299537  | -5.470083 | 1.119596  |

|   |           |           |           |
|---|-----------|-----------|-----------|
| C | 3.300702  | 1.885154  | 1.027724  |
| C | 3.385145  | 3.109066  | 0.339427  |
| C | 3.080160  | 4.277662  | 1.042788  |
| H | 3.122991  | 5.230132  | 0.528443  |
| C | 2.728513  | 4.238314  | 2.383936  |
| H | 2.500319  | 5.156724  | 2.912823  |
| C | 2.661441  | 3.019672  | 3.050366  |
| H | 2.380301  | 3.000411  | 4.095362  |
| C | 2.930849  | 1.822457  | 2.387192  |
| C | 3.808930  | 3.193758  | -1.119955 |
| H | 4.094628  | 2.195598  | -1.449478 |
| C | 2.647499  | 3.637766  | -2.016129 |
| H | 1.794837  | 2.971911  | -1.907143 |
| H | 2.954250  | 3.617242  | -3.065692 |
| H | 2.333058  | 4.653560  | -1.770185 |
| C | 5.016998  | 4.128145  | -1.304824 |
| H | 4.747665  | 5.167954  | -1.099966 |
| H | 5.375762  | 4.078988  | -2.336515 |
| H | 5.844262  | 3.867053  | -0.641097 |
| C | 2.878612  | 0.488210  | 3.117991  |
| H | 2.612640  | -0.270342 | 2.379744  |
| C | 1.816189  | 0.437948  | 4.220631  |
| H | 0.839611  | 0.738829  | 3.840056  |
| H | 2.074460  | 1.080878  | 5.066745  |
| H | 1.728575  | -0.582545 | 4.601980  |
| C | 4.258604  | 0.105029  | 3.679158  |
| H | 4.606958  | 0.856181  | 4.394080  |
| H | 5.005250  | 0.017900  | 2.889180  |
| H | 4.203955  | -0.857494 | 4.195828  |
| C | -4.872083 | 0.098400  | 0.013730  |
| C | -5.030361 | 1.376863  | -0.538226 |
| H | -6.049098 | 1.693833  | -0.705045 |
| C | -4.043881 | 2.339632  | -0.783938 |
| C | -6.134120 | -0.659883 | 0.350321  |
| H | -6.984562 | 0.016903  | 0.416153  |
| H | -6.036349 | -1.211290 | 1.284514  |
| H | -6.337471 | -1.392409 | -0.434966 |
| C | -4.517938 | 3.711233  | -1.202661 |
| H | -5.584768 | 3.823719  | -1.017171 |
| H | -4.334763 | 3.848492  | -2.271177 |
| H | -3.975866 | 4.501175  | -0.684033 |
| C | -3.609322 | -1.712552 | 0.952775  |
| C | -3.314617 | -1.680633 | 2.331722  |
| C | -3.209373 | -2.894974 | 3.010306  |
| H | -2.983496 | -2.898231 | 4.068787  |
| C | -3.376230 | -4.103548 | 2.344650  |
| H | -3.283584 | -5.037538 | 2.887044  |
| C | -3.640989 | -4.114101 | 0.983142  |
| H | -3.741753 | -5.060852 | 0.466150  |
| C | -3.758398 | -2.925612 | 0.259238  |
| C | -3.127998 | -0.357604 | 3.061393  |
| H | -2.731803 | 0.353144  | 2.334683  |
| C | -4.467238 | 0.207901  | 3.563167  |
| H | -5.157142 | 0.400889  | 2.741092  |
| H | -4.306828 | 1.152612  | 4.090622  |

|   |           |           |           |   |           |           |           |
|---|-----------|-----------|-----------|---|-----------|-----------|-----------|
| H | -4.946884 | -0.491104 | 4.254644  | N | 3.086989  | 1.789631  | 0.286087  |
| C | -2.113975 | -0.438604 | 4.207705  | N | -3.265000 | -1.691007 | 0.182358  |
| H | -2.489589 | -1.032816 | 5.045277  | N | -3.366088 | 1.127343  | -0.564092 |
| H | -1.905816 | 0.564307  | 4.588300  | C | 4.694215  | -0.463956 | -0.909642 |
| H | -1.171027 | -0.871482 | 3.869822  | C | 0.234954  | -1.691182 | 0.886296  |
| C | -3.981223 | -2.978607 | -1.244294 | C | 5.097685  | 0.849334  | -0.651994 |
| H | -4.139089 | -1.961738 | -1.603668 | H | 6.128291  | 1.076671  | -0.881743 |
| C | -5.212021 | -3.819243 | -1.619259 | C | 4.387840  | 1.859330  | 0.015193  |
| H | -5.063983 | -4.875043 | -1.376157 | C | 5.742391  | -1.397460 | -1.467792 |
| H | -5.399868 | -3.752280 | -2.694147 | H | 5.654051  | -2.403465 | -1.062078 |
| H | -6.110100 | -3.484209 | -1.094326 | H | 6.743947  | -1.016107 | -1.275370 |
| C | -2.726142 | -3.508342 | -1.954699 | H | 5.604780  | -1.470971 | -2.549988 |
| H | -2.498869 | -4.530721 | -1.640840 | C | 5.181468  | 3.074960  | 0.431888  |
| H | -1.859252 | -2.888484 | -1.738851 | H | 4.825040  | 3.486761  | 1.374639  |
| H | -2.874603 | -3.501114 | -3.037590 | H | 5.075978  | 3.855514  | -0.325256 |
| C | -1.818411 | 3.213702  | -0.735752 | H | 6.238519  | 2.828660  | 0.520645  |
| C | -1.421242 | 3.814830  | 0.474215  | C | 3.216708  | -2.343016 | -0.695007 |
| C | -0.583772 | 4.929602  | 0.411310  | C | 2.870096  | -3.009901 | -1.882784 |
| H | -0.262386 | 5.410209  | 1.326502  | C | 2.611576  | -4.382054 | -1.813754 |
| C | -0.157849 | 5.430070  | -0.812377 | H | 2.326083  | -4.910858 | -2.715155 |
| H | 0.482978  | 6.303891  | -0.845135 | C | 2.721030  | -5.075670 | -0.618195 |
| C | -0.525384 | 4.795506  | -1.991493 | H | 2.517203  | -6.139968 | -0.586954 |
| H | -0.154148 | 5.170647  | -2.937459 | C | 3.089133  | -4.404721 | 0.541965  |
| C | -1.345859 | 3.666125  | -1.980305 | H | 3.161810  | -4.953043 | 1.472164  |
| C | -1.930729 | 3.293822  | 1.810498  | C | 3.332825  | -3.032570 | 0.530989  |
| H | -2.243271 | 2.260847  | 1.654772  | C | 2.805023  | -2.302656 | -3.227274 |
| C | -3.169473 | 4.072225  | 2.283794  | H | 3.127639  | -1.272121 | -3.083104 |
| H | -3.992250 | 3.990776  | 1.571947  | C | 1.373253  | -2.252914 | -3.776166 |
| H | -2.934426 | 5.132999  | 2.411595  | H | 0.994088  | -3.259064 | -3.975336 |
| H | -3.519807 | 3.682838  | 3.244071  | H | 1.347854  | -1.687043 | -4.710630 |
| C | -0.847286 | 3.278594  | 2.892159  | H | 0.690165  | -1.763542 | -3.084900 |
| H | -1.222217 | 2.778458  | 3.789055  | C | 3.749004  | -2.955621 | -4.251909 |
| H | -0.542604 | 4.287556  | 3.182715  | H | 3.412078  | -3.961034 | -4.518898 |
| H | 0.040552  | 2.747653  | 2.550966  | H | 4.769444  | -3.041325 | -3.871006 |
| C | -1.683443 | 2.947051  | -3.277608 | H | 3.773973  | -2.361268 | -5.169146 |
| H | -2.437872 | 2.190980  | -3.059122 | C | 3.721351  | -2.302048 | 1.810609  |
| C | -0.452659 | 2.202067  | -3.821684 | H | 3.373129  | -1.272597 | 1.708197  |
| H | -0.026733 | 1.516874  | -3.089765 | C | 3.077958  | -2.886725 | 3.075542  |
| H | 0.331502  | 2.907435  | -4.112985 | H | 1.998773  | -2.995022 | 2.970269  |
| H | -0.731734 | 1.617739  | -4.702497 | H | 3.278803  | -2.229108 | 3.925202  |
| C | -2.252699 | 3.897629  | -4.342443 | H | 3.495592  | -3.866434 | 3.323487  |
| H | -2.573751 | 3.328666  | -5.218885 | C | 5.249650  | -2.246791 | 1.987348  |
| H | -1.502187 | 4.619288  | -4.676852 | H | 5.667341  | -3.257534 | 2.010680  |
| H | -3.111061 | 4.463289  | -3.970837 | H | 5.505469  | -1.751145 | 2.927771  |
| F | -2.103449 | -0.304095 | -2.250368 | H | 5.734835  | -1.696454 | 1.182342  |
| F | 1.899637  | 0.550016  | -2.111990 | C | 2.460160  | 2.813303  | 1.076834  |

**X = CI**

Imaginary frequencies: 0

Electronic Energy = -7653.05083418 a.u.

ZPVE correction = 1.288410 a.u.

|    |           |           |           |
|----|-----------|-----------|-----------|
| Ga | 1.966481  | 0.373084  | -0.558245 |
| Ga | -2.034290 | -0.343554 | -0.589363 |
| Si | -0.057841 | 0.091720  | 0.769385  |
| O  | 0.436646  | -2.796360 | 1.135099  |
| N  | 3.456237  | -0.922294 | -0.694246 |

|   |           |           |           |
|---|-----------|-----------|-----------|
| N | 3.086989  | 1.789631  | 0.286087  |
| N | -3.265000 | -1.691007 | 0.182358  |
| N | -3.366088 | 1.127343  | -0.564092 |
| C | 4.694215  | -0.463956 | -0.909642 |
| C | 0.234954  | -1.691182 | 0.886296  |
| C | 5.097685  | 0.849334  | -0.651994 |
| H | 6.128291  | 1.076671  | -0.881743 |
| C | 4.387840  | 1.859330  | 0.015193  |
| C | 5.742391  | -1.397460 | -1.467792 |
| H | 5.654051  | -2.403465 | -1.062078 |
| H | 6.743947  | -1.016107 | -1.275370 |
| H | 5.604780  | -1.470971 | -2.549988 |
| C | 5.181468  | 3.074960  | 0.431888  |
| H | 4.825040  | 3.486761  | 1.374639  |
| H | 5.075978  | 3.855514  | -0.325256 |
| H | 6.238519  | 2.828660  | 0.520645  |
| C | 3.216708  | -2.343016 | -0.695007 |
| C | 2.870096  | -3.009901 | -1.882784 |
| C | 2.611576  | -4.382054 | -1.813754 |
| H | 2.326083  | -4.910858 | -2.715155 |
| C | 2.721030  | -5.075670 | -0.618195 |
| H | 2.517203  | -6.139968 | -0.586954 |
| C | 3.089133  | -4.404721 | 0.541965  |
| H | 3.161810  | -4.953043 | 1.472164  |
| C | 3.332825  | -3.032570 | 0.530989  |
| C | 2.805023  | -2.302656 | -3.227274 |
| H | 3.127639  | -1.272121 | -3.083104 |
| C | 1.373253  | -2.252914 | -3.776166 |
| H | 0.994088  | -3.259064 | -3.975336 |
| H | 1.347854  | -1.687043 | -4.710630 |
| H | 0.690165  | -1.763542 | -3.084900 |
| C | 3.749004  | -2.955621 | -4.251909 |
| H | 3.412078  | -3.961034 | -4.518898 |
| H | 4.769444  | -3.041325 | -3.871006 |
| H | 3.773973  | -2.361268 | -5.169146 |
| C | 3.721351  | -2.302048 | 1.810609  |
| H | 3.373129  | -1.272597 | 1.708197  |
| C | 3.077958  | -2.886725 | 3.075542  |
| H | 1.998773  | -2.995022 | 2.970269  |
| H | 3.278803  | -2.229108 | 3.925202  |
| H | 3.495592  | -3.866434 | 3.323487  |
| C | 5.249650  | -2.246791 | 1.987348  |
| H | 5.667341  | -3.257534 | 2.010680  |
| H | 5.505469  | -1.751145 | 2.927771  |
| H | 5.734835  | -1.696454 | 1.182342  |
| C | 2.460160  | 2.813303  | 1.076834  |
| C | 2.062709  | 4.025383  | 0.484387  |
| C | 1.468236  | 4.993600  | 1.299372  |
| H | 1.146977  | 5.929276  | 0.858083  |
| C | 1.285234  | 4.777998  | 2.656413  |
| H | 0.829769  | 5.544423  | 3.273101  |
| C | 1.667106  | 3.566907  | 3.222753  |
| H | 1.498535  | 3.397915  | 4.278339  |
| C | 2.241615  | 2.559917  | 2.447645  |
| C | 2.239615  | 4.305048  | -0.999116 |
| H | 2.794433  | 3.477674  | -1.439769 |
| C | 0.875819  | 4.362842  | -1.699791 |
| H | 0.278339  | 3.477665  | -1.487653 |

H 1.005511 4.423373 -2.782882  
H 0.308537 5.234653 -1.369360  
C 3.022131 5.603098 -1.259207  
H 2.455703 6.480151 -0.934262  
H 3.216636 5.714759 -2.329156  
H 3.980057 5.619470 -0.734755  
C 2.647943 1.233500 3.070962  
H 2.549977 0.476920 2.290878  
C 1.735515 0.803576 4.224919  
H 0.685848 0.846180 3.930805  
H 1.873301 1.429805 5.110726  
H 1.964442 -0.224854 4.513933  
C 4.119947 1.243221 3.514826  
H 4.294487 2.032738 4.251464  
H 4.794205 1.406802 2.673434  
H 4.385753 0.286649 3.972812  
C -4.575088 -1.603795 -0.057791  
C -5.201093 -0.447609 -0.534676  
H -6.264084 -0.528190 -0.706685  
C -4.665181 0.843549 -0.660301  
C -5.453287 -2.804922 0.198025  
H -6.504954 -2.523885 0.200273  
H -5.207345 -3.291396 1.141122  
H -5.292571 -3.542491 -0.592718  
C -5.656711 1.955581 -0.910768  
H -6.661939 1.639404 -0.637386  
H -5.654864 2.215563 -1.971566  
H -5.399085 2.857886 -0.358139  
C -2.753919 -2.804095 0.937550  
C -2.635610 -2.658961 2.335495  
C -2.131143 -3.730358 3.073254  
H -2.036243 -3.640226 4.148173  
C -1.743188 -4.909321 2.450276  
H -1.345376 -5.728670 3.037990  
C -1.854878 -5.030152 1.073263  
H -1.533459 -5.944799 0.589914  
C -2.359059 -3.988583 0.291810  
C -3.076644 -1.386990 3.043572  
H -3.129787 -0.598455 2.293318  
C -4.486784 -1.543997 3.637715  
H -5.224480 -1.766540 2.865070  
H -4.795688 -0.622697 4.139190  
H -4.509773 -2.355498 4.370894  
C -2.081553 -0.934734 4.119397  
H -2.023165 -1.646141 4.946993  
H -2.395369 0.024080 4.538265  
H -1.081315 -0.811172 3.700654  
C -2.419672 -4.152862 -1.216551  
H -2.912585 -3.276544 -1.636648  
C -3.223113 -5.394633 -1.634507  
H -2.727137 -6.317273 -1.320753  
H -3.324246 -5.427145 -2.722508  
H -4.225351 -5.395161 -1.198880  
C -1.001743 -4.203357 -1.805056  
H -0.456053 -5.078805 -1.443226  
H -0.424649 -3.321096 -1.533461  
H -1.045357 -4.245955 -2.895523  
C -2.947049 2.505116 -0.552955

C -2.684989 3.109692 0.693736  
C -2.354298 4.465655 0.716308  
H -2.147085 4.948912 1.661679  
C -2.292357 5.205330 -0.456928  
H -2.046603 6.260632 -0.420181  
C -2.517842 4.586260 -1.677134  
H -2.432671 5.161665 -2.590869  
C -2.833142 3.227881 -1.756299  
C -2.819606 2.327119 1.991407  
H -2.591301 1.285865 1.763159  
C -4.259808 2.371293 2.528475  
H -4.967509 1.926772 1.827562  
H -4.569242 3.403227 2.718121  
H -4.331322 1.817382 3.468693  
C -1.822905 2.775739 3.063021  
H -1.863448 2.096986 3.917222  
H -2.044302 3.779690 3.435545  
H -0.803975 2.774697 2.677956  
C -3.015528 2.585543 -3.122620  
H -3.388555 1.571827 -2.977884  
C -1.662554 2.470848 -3.844207  
H -0.936511 1.912189 -3.256273  
H -1.246646 3.462225 -4.046935  
H -1.786600 1.948916 -4.796418  
C -4.022119 3.345814 -4.002026  
H -4.210125 2.785937 -4.921739  
H -3.639148 4.328678 -4.289642  
H -4.978170 3.501712 -3.496607  
Cl 1.709658 1.106321 -2.647563  
Cl -1.939281 -0.878337 -2.748740

**X = Br**

Imaginary frequencies: 0

Electronic Energy = -11880.9651023 a.u.

ZPVE correction = 1.287583 a.u.

Ga 2.000653 0.258646 -0.432471  
Ga -2.057811 -0.236449 -0.441903  
Si -0.040156 0.082484 0.892105  
O 0.309148 -2.823617 1.281971  
N 3.425999 -1.115186 -0.537617  
N 3.178144 1.624378 0.425814  
N -3.339240 -1.534799 0.337084  
N -3.310997 1.306544 -0.351001  
C 4.684806 -0.714609 -0.747962  
C 0.159990 -1.712488 1.022758  
C 5.144393 0.582301 -0.501109  
H 6.184996 0.760741 -0.729449  
C 4.482247 1.628128 0.160681  
C 5.695170 -1.696754 -1.292201  
H 5.536635 -2.703778 -0.911829  
H 6.710577 -1.377885 -1.061962  
H 5.587830 -1.738401 -2.379720  
C 5.335491 2.802704 0.577570  
H 4.988831 3.244688 1.510044  
H 5.284874 3.578315 -0.190429  
H 6.375901 2.499473 0.684952

|   |          |           |           |   |           |           |           |
|---|----------|-----------|-----------|---|-----------|-----------|-----------|
| C | 3.122262 | -2.524315 | -0.512167 | C | -4.646005 | -1.377393 | 0.111549  |
| C | 2.748091 | -3.201096 | -1.686345 | C | -5.217562 | -0.182042 | -0.335257 |
| C | 2.418705 | -4.556211 | -1.588063 | H | -6.284915 | -0.206711 | -0.497708 |
| H | 2.110401 | -5.089209 | -2.479413 | C | -4.623099 | 1.086667  | -0.431680 |
| C | 2.488590 | -5.228611 | -0.377770 | C | -5.580932 | -2.538277 | 0.351248  |
| H | 2.229183 | -6.279797 | -0.323842 | H | -6.617098 | -2.205295 | 0.372404  |
| C | 2.892515 | -4.552660 | 0.767011  | H | -5.349728 | -3.058658 | 1.279752  |
| H | 2.940082 | -5.084101 | 1.708559  | H | -5.465701 | -3.263687 | -0.458557 |
| C | 3.206059 | -3.195310 | 0.726853  | C | -5.568767 | 2.247998  | -0.630908 |
| C | 2.735265 | -2.530278 | -3.050325 | H | -6.572250 | 1.982756  | -0.302125 |
| H | 3.087643 | -1.506807 | -2.927284 | H | -5.613033 | 2.502854  | -1.692156 |
| C | 1.319944 | -2.452799 | -3.636117 | H | -5.236865 | 3.137285  | -0.097876 |
| H | 0.913334 | -3.452031 | -3.814992 | C | -2.880779 | -2.677485 | 1.083461  |
| H | 1.334828 | -1.915140 | -4.587301 | C | -2.762130 | -2.550664 | 2.483403  |
| H | 0.637044 | -1.921361 | -2.975989 | C | -2.307410 | -3.648772 | 3.214192  |
| C | 3.681690 | -3.242688 | -4.032581 | H | -2.214116 | -3.571374 | 4.290277  |
| H | 3.318510 | -4.244495 | -4.277922 | C | -1.969418 | -4.838891 | 2.583990  |
| H | 4.689329 | -3.349239 | -3.624505 | H | -1.609206 | -5.679156 | 3.166366  |
| H | 3.747359 | -2.676794 | -4.965740 | C | -2.085598 | -4.944585 | 1.206389  |
| C | 3.643867 | -2.466112 | 1.990371  | H | -1.806808 | -5.869759 | 0.716653  |
| H | 3.379176 | -1.415672 | 1.861545  | C | -2.541525 | -3.876071 | 0.431600  |
| C | 2.950032 | -2.968828 | 3.263724  | C | -3.156496 | -1.271605 | 3.205643  |
| H | 1.865549 | -2.983562 | 3.156506  | H | -3.198524 | -0.476067 | 2.462434  |
| H | 3.206630 | -2.317166 | 4.102613  | C | -4.561611 | -1.395497 | 3.819479  |
| H | 3.278329 | -3.977081 | 3.530330  | H | -5.315252 | -1.597089 | 3.056467  |
| C | 5.171255 | -2.529505 | 2.171845  | H | -4.840428 | -0.468702 | 4.328327  |
| H | 5.505562 | -3.569489 | 2.229280  | H | -4.594913 | -2.208894 | 4.550106  |
| H | 5.466133 | -2.025424 | 3.096196  | C | -2.133559 | -0.857894 | 4.270767  |
| H | 5.699826 | -2.048182 | 1.349795  | H | -2.069506 | -1.588299 | 5.081055  |
| C | 2.604209 | 2.673702  | 1.225436  | H | -2.424297 | 0.095477  | 4.717314  |
| C | 2.267959 | 3.910652  | 0.646022  | H | -1.139809 | -0.740711 | 3.834878  |
| C | 1.732403 | 4.903281  | 1.472528  | C | -2.615562 | -4.035249 | -1.076151 |
| H | 1.459191 | 5.857974  | 1.039737  | H | -3.057049 | -3.131102 | -1.494310 |
| C | 1.547888 | 4.688768  | 2.829164  | C | -3.493143 | -5.226545 | -1.492076 |
| H | 1.139586 | 5.474275  | 3.454814  | H | -3.052841 | -6.177360 | -1.179261 |
| C | 1.868507 | 3.454763  | 3.383207  | H | -3.598751 | -5.252555 | -2.579858 |
| H | 1.700050 | 3.287088  | 4.438964  | H | -4.492447 | -5.166720 | -1.053996 |
| C | 2.381692 | 2.423945  | 2.596541  | C | -1.205554 | -4.170232 | -1.669603 |
| C | 2.448295 | 4.197987  | -0.835088 | H | -0.712413 | -5.077844 | -1.311485 |
| H | 2.945239 | 3.343134  | -1.292096 | H | -0.575343 | -3.325036 | -1.397704 |
| C | 1.083435 | 4.351443  | -1.519219 | H | -1.255035 | -4.207753 | -2.759923 |
| H | 0.434777 | 3.501464  | -1.312574 | C | -2.823209 | 2.661945  | -0.305838 |
| H | 1.204747 | 4.420885  | -2.602659 | C | -2.502005 | 3.210964  | 0.953355  |
| H | 0.574158 | 5.251121  | -1.169029 | C | -2.091691 | 4.543826  | 1.011602  |
| C | 3.308843 | 5.447191  | -1.087750 | H | -1.835420 | 4.981985  | 1.966578  |
| H | 2.802589 | 6.354230  | -0.746178 | C | -2.011352 | 5.318471  | -0.137453 |
| H | 3.499463 | 5.559613  | -2.158328 | H | -1.701757 | 6.355406  | -0.072204 |
| H | 4.270931 | 5.396041  | -0.573490 | C | -2.303831 | 4.755841  | -1.369984 |
| C | 2.720393 | 1.075435  | 3.211876  | H | -2.208979 | 5.356282  | -2.266481 |
| H | 2.585036 | 0.329537  | 2.427475  | C | -2.699374 | 3.421092  | -1.486031 |
| C | 1.785880 | 0.685970  | 4.362698  | C | -2.659568 | 2.400174  | 2.230727  |
| H | 0.740376 | 0.779550  | 4.065953  | H | -2.472955 | 1.356926  | 1.974720  |
| H | 1.950842 | 1.302405  | 5.250663  | C | -4.093821 | 2.489267  | 2.778339  |
| H | 1.964303 | -0.352688 | 4.649402  | H | -4.823277 | 2.088868  | 2.073311  |
| C | 4.190571 | 1.011095  | 3.657257  | H | -4.360218 | 3.528404  | 2.992283  |
| H | 4.402175 | 1.787818  | 4.397754  | H | -4.181783 | 1.918670  | 3.706993  |
| H | 4.873127 | 1.146247  | 2.817399  | C | -1.640829 | 2.783240  | 3.306901  |
| H | 4.409482 | 0.040890  | 4.111120  | H | -1.699672 | 2.084062  | 4.142709  |



|    |           |           |           |
|----|-----------|-----------|-----------|
| H  | -1.824256 | 3.783792  | 3.708096  |
| H  | -0.625642 | 2.756690  | 2.913317  |
| C  | -2.956688 | 2.848436  | -2.870788 |
| H  | -3.360220 | 1.842447  | -2.757108 |
| C  | -1.637827 | 2.722604  | -3.650583 |
| H  | -0.909561 | 2.115769  | -3.115148 |
| H  | -1.196511 | 3.707896  | -3.827549 |
| H  | -1.815484 | 2.247171  | -4.618484 |
| C  | -3.966950 | 3.684152  | -3.674788 |
| H  | -4.211468 | 3.174079  | -4.610125 |
| H  | -3.557356 | 4.664327  | -3.933461 |
| H  | -4.895850 | 3.852455  | -3.125254 |
| Br | 1.795665  | 1.036903  | -2.676062 |
| Br | -2.040786 | -0.764331 | -2.763461 |

**X = I**

Imaginary frequencies: 0

Electronic Energy = -7328.19810153 a.u.

ZPVE correction = 1.287315 a.u.

|    |           |           |           |
|----|-----------|-----------|-----------|
| I  | 1.872115  | 1.045900  | -2.759850 |
| I  | -2.170110 | -0.691793 | -2.826215 |
| Ga | 2.025854  | 0.194968  | -0.311687 |
| Ga | -2.074190 | -0.182856 | -0.285449 |
| Si | -0.021910 | 0.073950  | 1.012042  |
| O  | 0.275686  | -2.832162 | 1.442660  |
| N  | 3.419026  | -1.220621 | -0.394254 |
| N  | 3.223002  | 1.531431  | 0.573072  |
| N  | -3.358178 | -1.470669 | 0.513385  |
| N  | -3.287225 | 1.394811  | -0.109289 |
| C  | 4.684073  | -0.840349 | -0.606057 |
| C  | 0.140695  | -1.723336 | 1.166004  |
| C  | 5.163794  | 0.450976  | -0.365692 |
| H  | 6.205793  | 0.611621  | -0.600966 |
| C  | 4.526687  | 1.507527  | 0.304487  |
| C  | 5.679701  | -1.837503 | -1.149831 |
| H  | 5.486861  | -2.847935 | -0.795936 |
| H  | 6.698371  | -1.551030 | -0.892754 |
| H  | 5.593728  | -1.850153 | -2.240227 |
| C  | 5.406570  | 2.660611  | 0.725125  |
| H  | 5.083048  | 3.092936  | 1.670425  |
| H  | 5.354601  | 3.449284  | -0.029405 |
| H  | 6.443535  | 2.339301  | 0.809779  |
| C  | 3.092736  | -2.625821 | -0.350243 |
| C  | 2.705720  | -3.315895 | -1.513049 |
| C  | 2.345666  | -4.661462 | -1.393337 |
| H  | 2.026817  | -5.201055 | -2.276954 |
| C  | 2.400870  | -5.316921 | -0.173466 |
| H  | 2.117021  | -6.360730 | -0.102602 |
| C  | 2.827107  | -4.633159 | 0.957916  |
| H  | 2.871019  | -5.152088 | 1.906532  |
| C  | 3.171432  | -3.283997 | 0.896280  |
| C  | 2.718262  | -2.677289 | -2.891502 |
| H  | 3.081529  | -1.655570 | -2.787694 |
| C  | 1.312901  | -2.599665 | -3.499045 |
| H  | 0.896658  | -3.598206 | -3.657954 |
| H  | 1.345079  | -2.085401 | -4.462477 |

|   |           |           |           |
|---|-----------|-----------|-----------|
| H | 0.627841  | -2.044775 | -2.860520 |
| C | 3.671105  | -3.421740 | -3.843354 |
| H | 3.300904  | -4.425140 | -4.070916 |
| H | 4.671384  | -3.528667 | -3.418094 |
| H | 3.755974  | -2.877536 | -4.787816 |
| C | 3.648491  | -2.557613 | 2.146203  |
| H | 3.435274  | -1.497945 | 2.003486  |
| C | 2.937518  | -3.010662 | 3.428555  |
| H | 1.853043  | -2.964210 | 3.329032  |
| H | 3.237700  | -2.370262 | 4.261233  |
| H | 3.209088  | -4.034239 | 3.699885  |
| C | 5.172059  | -2.695417 | 2.318900  |
| H | 5.453210  | -3.749670 | 2.396907  |
| H | 5.500553  | -2.186791 | 3.229267  |
| H | 5.717192  | -2.261178 | 1.481406  |
| C | 2.680564  | 2.579778  | 1.398633  |
| C | 2.366951  | 3.837159  | 0.850519  |
| C | 1.875303  | 4.828526  | 1.705462  |
| H | 1.621190  | 5.798103  | 1.294816  |
| C | 1.711013  | 4.595219  | 3.061116  |
| H | 1.338175  | 5.380260  | 3.709085  |
| C | 2.006212  | 3.342183  | 3.584720  |
| H | 1.853225  | 3.158818  | 4.640143  |
| C | 2.474133  | 2.312230  | 2.769247  |
| C | 2.522482  | 4.153792  | -0.626596 |
| H | 2.983740  | 3.296203  | -1.114908 |
| C | 1.146236  | 4.364308  | -1.272169 |
| H | 0.476840  | 3.528776  | -1.070021 |
| H | 1.242104  | 4.458622  | -2.356101 |
| H | 0.672286  | 5.268414  | -0.885652 |
| C | 3.414070  | 5.381944  | -0.874005 |
| H | 2.943633  | 6.296643  | -0.502950 |
| H | 3.583637  | 5.509849  | -1.946347 |
| H | 4.385662  | 5.291423  | -0.383701 |
| C | 2.781799  | 0.945249  | 3.358191  |
| H | 2.620853  | 0.217242  | 2.562222  |
| C | 1.844388  | 0.562680  | 4.509315  |
| H | 0.800160  | 0.689028  | 4.220746  |
| H | 2.030778  | 1.161013  | 5.405291  |
| H | 1.996059  | -0.484044 | 4.779628  |
| C | 4.252821  | 0.837534  | 3.792236  |
| H | 4.489171  | 1.600405  | 4.539571  |
| H | 4.932830  | 0.964817  | 2.948949  |
| H | 4.450451  | -0.142486 | 4.234132  |
| C | -4.665350 | -1.280996 | 0.309961  |
| C | -5.217738 | -0.064175 | -0.099701 |
| H | -6.287697 | -0.064149 | -0.247079 |
| C | -4.603931 | 1.198706  | -0.163915 |
| C | -5.620160 | -2.428669 | 0.533473  |
| H | -6.649675 | -2.077217 | 0.571815  |
| H | -5.390579 | -2.974105 | 1.447850  |
| H | -5.525358 | -3.137300 | -0.293833 |
| C | -5.539793 | 2.377382  | -0.297559 |
| H | -6.520210 | 2.131840  | 0.107748  |
| H | -5.661510 | 2.622296  | -1.355303 |
| H | -5.153821 | 3.264150  | 0.201135  |
| C | -2.917123 | -2.629506 | 1.247605  |
| C | -2.796981 | -2.520403 | 2.649179  |

|   |           |           |           |
|---|-----------|-----------|-----------|
| C | -2.360079 | -3.632624 | 3.369509  |
| H | -2.267036 | -3.566854 | 4.446361  |
| C | -2.041448 | -4.822293 | 2.729340  |
| H | -1.694229 | -5.673429 | 3.303729  |
| C | -2.163485 | -4.913453 | 1.351576  |
| H | -1.903897 | -5.839304 | 0.852737  |
| C | -2.603147 | -3.830715 | 0.587243  |
| C | -3.174660 | -1.247292 | 3.389650  |
| H | -3.225045 | -0.443543 | 2.656225  |
| C | -4.570184 | -1.373602 | 4.024672  |
| H | -5.335870 | -1.567831 | 3.271754  |
| H | -4.839373 | -0.450607 | 4.545361  |
| H | -4.594028 | -2.192892 | 4.749006  |
| C | -2.132371 | -0.852841 | 4.443205  |
| H | -2.048416 | -1.601698 | 5.234389  |
| H | -2.417968 | 0.087788  | 4.918503  |
| H | -1.147932 | -0.721983 | 3.990056  |
| C | -2.690555 | -3.983655 | -0.919389 |
| H | -3.118676 | -3.070196 | -1.330899 |
| C | -3.595613 | -5.154148 | -1.334802 |
| H | -3.173205 | -6.115933 | -1.031036 |
| H | -3.710072 | -5.170838 | -2.421859 |
| H | -4.589961 | -5.075338 | -0.888570 |
| C | -1.287811 | -4.144387 | -1.522626 |
| H | -0.810707 | -5.063202 | -1.171403 |
| H | -0.638713 | -3.313552 | -1.249479 |
| H | -1.344056 | -4.174966 | -2.612666 |
| C | -2.771525 | 2.739837  | -0.025955 |
| C | -2.399718 | 3.232153  | 1.243530  |
| C | -1.953239 | 4.550896  | 1.342145  |
| H | -1.656991 | 4.942850  | 2.305285  |
| C | -1.887938 | 5.370948  | 0.224549  |
| H | -1.548795 | 6.396026  | 0.321898  |
| C | -2.237373 | 4.867657  | -1.017934 |
| H | -2.159728 | 5.502823  | -1.891818 |
| C | -2.670723 | 3.548749  | -1.175659 |
| C | -2.546463 | 2.382628  | 2.496303  |
| H | -2.380064 | 1.345320  | 2.204632  |
| C | -3.969794 | 2.479627  | 3.070891  |
| H | -4.718016 | 2.112417  | 2.367529  |
| H | -4.214001 | 3.516711  | 3.318372  |
| H | -4.052546 | 1.884881  | 3.984520  |
| C | -1.504215 | 2.718349  | 3.565772  |
| H | -1.557247 | 1.995055  | 4.380427  |
| H | -1.667678 | 3.707911  | 4.001213  |
| H | -0.496686 | 2.691432  | 3.153261  |
| C | -2.996690 | 3.055538  | -2.575872 |
| H | -3.400654 | 2.046105  | -2.500297 |
| C | -1.718299 | 2.973581  | -3.425180 |
| H | -0.965920 | 2.338710  | -2.959785 |
| H | -1.283174 | 3.966963  | -3.568701 |
| H | -1.942951 | 2.551974  | -4.408015 |
| C | -4.039824 | 3.938571  | -3.281915 |
| H | -4.333970 | 3.481201  | -4.230162 |
| H | -3.635798 | 4.929320  | -3.506776 |
| H | -4.938512 | 4.081199  | -2.678251 |

**X = Me**

Imaginary frequencies: 0

Electronic Energy = -6812.31648633 a.u.

ZPVE correction = 1.358007 a.u.

|    |           |           |           |
|----|-----------|-----------|-----------|
| Ga | 1.999921  | -0.770115 | 0.799372  |
| Ga | -1.810620 | 0.843765  | 0.803578  |
| Si | 0.201262  | 0.293116  | -0.460227 |
| O  | -1.003251 | -2.189263 | -1.475643 |
| N  | 2.994802  | -2.006629 | -0.441656 |
| N  | 3.537153  | 0.549733  | 0.852795  |
| N  | -2.887328 | 2.045513  | -0.434603 |
| N  | -3.404764 | -0.374844 | 1.072799  |
| C  | 4.303498  | -2.161367 | -0.262695 |
| C  | 5.105081  | -1.242009 | 0.432584  |
| H  | 6.145543  | -1.513235 | 0.535758  |
| C  | 4.777269  | 0.068829  | 0.826920  |
| C  | 4.986124  | -3.388371 | -0.821405 |
| H  | 6.067820  | -3.265516 | -0.837473 |
| H  | 4.633924  | -3.622605 | -1.824772 |
| H  | 4.742714  | -4.249566 | -0.191498 |
| C  | 5.929106  | 0.958653  | 1.238010  |
| H  | 5.853708  | 1.943855  | 0.778090  |
| H  | 6.882689  | 0.509036  | 0.966847  |
| H  | 5.911325  | 1.111900  | 2.319817  |
| C  | 2.292262  | -2.799453 | -1.408937 |
| C  | 1.626117  | -3.975634 | -1.020370 |
| C  | 0.905686  | -4.683999 | -1.983332 |
| H  | 0.376697  | -5.583907 | -1.692880 |
| C  | 0.841889  | -4.248026 | -3.298316 |
| H  | 0.270192  | -4.806296 | -4.030656 |
| C  | 1.507909  | -3.088107 | -3.670771 |
| H  | 1.457447  | -2.753077 | -4.699699 |
| C  | 2.239206  | -2.344586 | -2.743718 |
| C  | 1.643597  | -4.477897 | 0.412475  |
| H  | 2.317708  | -3.837917 | 0.980734  |
| C  | 0.245975  | -4.374877 | 1.043020  |
| H  | 0.269146  | -4.688790 | 2.090170  |
| H  | -0.469756 | -5.011864 | 0.519031  |
| H  | -0.144442 | -3.357404 | 1.005447  |
| C  | 2.181557  | -5.914255 | 0.511909  |
| H  | 3.168885  | -6.003512 | 0.052026  |
| H  | 1.518299  | -6.625592 | 0.012492  |
| H  | 2.263537  | -6.216682 | 1.559696  |
| C  | 2.991525  | -1.102957 | -3.198725 |
| H  | 3.325131  | -0.575049 | -2.305773 |
| C  | 4.244093  | -1.481448 | -4.008433 |
| H  | 4.796194  | -0.582873 | -4.297983 |
| H  | 3.970570  | -2.020009 | -4.920458 |
| H  | 4.918882  | -2.118125 | -3.433633 |
| C  | 2.103739  | -0.143097 | -3.999925 |
| H  | 1.272336  | 0.214634  | -3.390657 |
| H  | 1.697049  | -0.616845 | -4.896714 |
| H  | 2.685935  | 0.722331  | -4.324498 |
| C  | 3.331671  | 1.950432  | 1.095307  |
| C  | 3.250216  | 2.442713  | 2.412211  |
| C  | 3.121616  | 3.820796  | 2.604068  |
| H  | 3.059342  | 4.211659  | 3.612751  |

|   |           |           |           |
|---|-----------|-----------|-----------|
| C | 3.080891  | 4.694510  | 1.528756  |
| H | 2.995741  | 5.762130  | 1.695598  |
| C | 3.117587  | 4.191822  | 0.234842  |
| H | 3.049413  | 4.876044  | -0.600548 |
| C | 3.217914  | 2.821632  | -0.009052 |
| C | 3.263557  | 1.526878  | 3.624515  |
| H | 3.507908  | 0.521783  | 3.282824  |
| C | 4.315915  | 1.932517  | 4.668117  |
| H | 4.081360  | 2.899095  | 5.121607  |
| H | 5.313030  | 2.007963  | 4.228209  |
| H | 4.354201  | 1.192167  | 5.471798  |
| C | 1.863786  | 1.480511  | 4.260249  |
| H | 1.579616  | 2.463884  | 4.644973  |
| H | 1.837930  | 0.770329  | 5.091611  |
| H | 1.108607  | 1.182853  | 3.532369  |
| C | 3.216046  | 2.295886  | -1.436697 |
| H | 2.839206  | 1.273337  | -1.393986 |
| C | 4.633170  | 2.243102  | -2.030141 |
| H | 5.090189  | 3.237285  | -2.034196 |
| H | 4.599678  | 1.882353  | -3.061932 |
| H | 5.282477  | 1.571773  | -1.466004 |
| C | 2.267916  | 3.089392  | -2.343062 |
| H | 1.261440  | 3.127568  | -1.926343 |
| H | 2.198966  | 2.616348  | -3.322809 |
| H | 2.612825  | 4.114742  | -2.502398 |
| C | -4.149702 | 2.293212  | -0.118005 |
| C | -4.869585 | 1.532333  | 0.825334  |
| H | -5.848373 | 1.910168  | 1.083404  |
| C | -4.566715 | 0.249816  | 1.298615  |
| C | -4.887866 | 3.438150  | -0.772729 |
| H | -4.643419 | 4.372404  | -0.260163 |
| H | -5.964892 | 3.288096  | -0.713181 |
| H | -4.595668 | 3.556950  | -1.815235 |
| C | -5.631939 | -0.438494 | 2.124060  |
| H | -5.349679 | -0.381936 | 3.179672  |
| H | -5.725975 | -1.493802 | 1.875469  |
| H | -6.598442 | 0.047600  | 2.000302  |
| C | -2.246952 | 2.753859  | -1.504801 |
| C | -1.691642 | 4.027177  | -1.287626 |
| C | -1.077639 | 4.676716  | -2.362380 |
| H | -0.645698 | 5.658948  | -2.210737 |
| C | -0.995625 | 4.080189  | -3.611478 |
| H | -0.511073 | 4.597859  | -4.431335 |
| C | -1.514300 | 2.804656  | -3.801492 |
| H | -1.424355 | 2.332497  | -4.771319 |
| C | -2.138822 | 2.119638  | -2.759930 |
| C | -1.688253 | 4.687740  | 0.081223  |
| H | -2.286725 | 4.073742  | 0.754428  |
| C | -0.257138 | 4.732974  | 0.638092  |
| H | 0.375393  | 5.381422  | 0.027416  |
| H | 0.205670  | 3.745688  | 0.644404  |
| H | -0.246260 | 5.119235  | 1.660817  |
| C | -2.298999 | 6.097842  | 0.059135  |
| H | -2.361188 | 6.499336  | 1.074343  |
| H | -3.303145 | 6.098301  | -0.370562 |
| H | -1.688474 | 6.786719  | -0.530763 |
| C | -2.715183 | 0.730847  | -2.973086 |
| H | -2.649575 | 0.219932  | -2.012263 |

|   |           |           |           |
|---|-----------|-----------|-----------|
| C | -4.203991 | 0.798993  | -3.353574 |
| H | -4.801655 | 1.260275  | -2.566496 |
| H | -4.599931 | -0.204799 | -3.526524 |
| H | -4.338709 | 1.379979  | -4.270604 |
| C | -1.937540 | -0.108333 | -3.991823 |
| H | -2.068724 | 0.264812  | -5.011603 |
| H | -2.293332 | -1.139956 | -3.969601 |
| H | -0.871894 | -0.119007 | -3.763212 |
| C | -3.318336 | -1.790173 | 1.315636  |
| C | -2.901563 | -2.271235 | 2.570068  |
| C | -2.816999 | -3.651751 | 2.767187  |
| H | -2.485167 | -4.031616 | 3.726204  |
| C | -3.158355 | -4.540175 | 1.760137  |
| H | -3.087969 | -5.608765 | 1.928286  |
| C | -3.586923 | -4.054860 | 0.530968  |
| H | -3.850133 | -4.755354 | -0.250470 |
| C | -3.674804 | -2.684971 | 0.280641  |
| C | -2.550417 | -1.335937 | 3.714406  |
| H | -2.846591 | -0.328800 | 3.423545  |
| C | -1.035215 | -1.325149 | 3.950326  |
| H | -0.765088 | -0.617893 | 4.739434  |
| H | -0.501981 | -1.043244 | 3.043010  |
| H | -0.678305 | -2.315141 | 4.246233  |
| C | -3.305493 | -1.681081 | 5.007238  |
| H | -3.111333 | -0.921881 | 5.769967  |
| H | -2.989262 | -2.644947 | 5.414414  |
| H | -4.384173 | -1.730107 | 4.840072  |
| C | -4.181483 | -2.187579 | -1.067384 |
| H | -3.671598 | -1.245549 | -1.266677 |
| C | -5.694233 | -1.895916 | -1.042547 |
| H | -5.945160 | -1.062844 | -0.388936 |
| H | -6.249563 | -2.777501 | -0.708655 |
| H | -6.041995 | -1.638927 | -2.046748 |
| C | -3.879683 | -3.148434 | -2.226172 |
| H | -4.102178 | -2.655227 | -3.175882 |
| H | -4.507816 | -4.042849 | -2.177559 |
| H | -2.835278 | -3.454337 | -2.237412 |
| C | 2.103065  | -1.684781 | 2.574674  |
| H | 3.134378  | -2.026786 | 2.705085  |
| H | 1.441917  | -2.547948 | 2.622327  |
| H | 1.850587  | -1.027474 | 3.403654  |
| C | -1.623140 | 1.904684  | 2.491706  |
| H | -0.913307 | 2.720304  | 2.351103  |
| H | -1.265342 | 1.296669  | 3.321588  |
| H | -2.591814 | 2.330490  | 2.767865  |
| C | -0.510976 | -1.264553 | -0.984243 |

**X = OMe**

Imaginary frequencies: 0

Electronic Energy = -6962.85472181 a.u.

ZPVE correction = 1.368464 a.u.

|    |           |           |           |
|----|-----------|-----------|-----------|
| Ga | -1.952166 | -0.435681 | -0.509652 |
| Ga | 1.855949  | 0.515742  | -0.456509 |
| Si | -0.148494 | 0.335844  | 0.896311  |
| O  | 0.627772  | -2.365591 | 1.780155  |
| N  | -3.226176 | -1.643621 | 0.435802  |

|   |           |           |           |   |           |           |           |
|---|-----------|-----------|-----------|---|-----------|-----------|-----------|
| N | -3.348929 | 0.939460  | -0.874432 | H | -3.567667 | 1.531464  | -5.548865 |
| N | 3.103100  | 1.706237  | 0.580223  | C | -1.207203 | 1.622760  | -4.081466 |
| N | 3.319520  | -0.755267 | -0.936351 | H | -0.805271 | 2.563253  | -4.472188 |
| C | -4.520985 | -1.661453 | 0.130280  | H | -1.174680 | 0.882491  | -4.885554 |
| C | -5.154399 | -0.647155 | -0.601166 | H | -0.555534 | 1.286571  | -3.275198 |
| H | -6.204127 | -0.798970 | -0.804429 | C | -3.088425 | 2.671913  | 1.419854  |
| C | -4.634664 | 0.602506  | -0.976984 | H | -2.838388 | 1.610611  | 1.414267  |
| C | -5.368919 | -2.829156 | 0.575384  | C | -4.549984 | 2.792437  | 1.880012  |
| H | -6.429431 | -2.592406 | 0.506289  | H | -4.880940 | 3.834904  | 1.853010  |
| H | -5.131213 | -3.133841 | 1.593682  | H | -4.656742 | 2.429468  | 2.906339  |
| H | -5.162414 | -3.688332 | -0.069639 | H | -5.220419 | 2.205992  | 1.249639  |
| C | -5.619548 | 1.607593  | -1.528346 | C | -2.138827 | 3.348430  | 2.415868  |
| H | -5.495496 | 2.583290  | -1.058581 | H | -1.101275 | 3.275209  | 2.088274  |
| H | -6.642630 | 1.266085  | -1.381364 | H | -2.212693 | 2.863605  | 3.391168  |
| H | -5.447887 | 1.748027  | -2.597789 | H | -2.379401 | 4.405697  | 2.558076  |
| C | -2.688918 | -2.554222 | 1.406613  | C | 4.380456  | 1.823598  | 0.240384  |
| C | -2.163338 | -3.793621 | 1.003481  | C | 5.012133  | 0.958232  | -0.666971 |
| C | -1.597078 | -4.619921 | 1.975808  | H | 6.029469  | 1.210759  | -0.927931 |
| H | -1.175041 | -5.572995 | 1.680118  | C | 4.548994  | -0.272362 | -1.150365 |
| C | -1.551757 | -4.235015 | 3.307986  | C | 5.220122  | 2.927241  | 0.839397  |
| H | -1.102035 | -4.887604 | 4.047429  | H | 5.005772  | 3.872296  | 0.333655  |
| C | -2.072990 | -3.005662 | 3.691040  | H | 6.281334  | 2.710587  | 0.726835  |
| H | -2.029881 | -2.710669 | 4.732203  | H | 4.989893  | 3.070349  | 1.894875  |
| C | -2.643241 | -2.141790 | 2.755489  | C | 5.533285  | -1.077666 | -1.969168 |
| C | -2.171162 | -4.234194 | -0.449639 | H | 5.343304  | -0.890949 | -3.029323 |
| H | -2.755513 | -3.506328 | -1.010779 | H | 5.427673  | -2.147667 | -1.804382 |
| C | -0.750819 | -4.233471 | -1.033506 | H | 6.556701  | -0.777690 | -1.749046 |
| H | -0.768619 | -4.551435 | -2.079285 | C | 2.536389  | 2.514619  | 1.620288  |
| H | -0.099287 | -4.916764 | -0.484679 | C | 2.088784  | 3.817023  | 1.342067  |
| H | -0.307132 | -3.239446 | -1.005575 | C | 1.491283  | 4.545589  | 2.374530  |
| C | -2.837560 | -5.607375 | -0.629384 | H | 1.133945  | 5.549156  | 2.176885  |
| H | -3.838929 | -5.630346 | -0.191587 | C | 1.337014  | 4.002184  | 3.641468  |
| H | -2.252352 | -6.401639 | -0.158084 | H | 0.867602  | 4.581891  | 4.427966  |
| H | -2.922995 | -5.848271 | -1.692632 | C | 1.766960  | 2.704705  | 3.895605  |
| C | -3.237153 | -0.812908 | 3.200830  | H | 1.622894  | 2.280116  | 4.880688  |
| H | -3.356923 | -0.194910 | 2.310967  | C | 2.362039  | 1.936730  | 2.895524  |
| C | -4.636122 | -1.011054 | 3.809951  | C | 2.198881  | 4.426664  | -0.045615 |
| H | -5.063273 | -0.048744 | 4.105852  | H | 2.836287  | 3.778091  | -0.645654 |
| H | -4.585852 | -1.648842 | 4.697311  | C | 0.823095  | 4.472351  | -0.724932 |
| H | -5.321479 | -1.476634 | 3.099944  | H | 0.123884  | 5.072358  | -0.140510 |
| C | -2.330189 | -0.048351 | 4.173008  | H | 0.403238  | 3.473771  | -0.846514 |
| H | -1.355761 | 0.150342  | 3.723784  | H | 0.899857  | 4.919215  | -1.720089 |
| H | -2.177792 | -0.595061 | 5.106995  | C | 2.842113  | 5.821999  | -0.020691 |
| H | -2.785398 | 0.911607  | 4.428551  | H | 3.013221  | 6.175168  | -1.041229 |
| C | -2.967875 | 2.308016  | -1.108059 | H | 3.799969  | 5.818117  | 0.505811  |
| C | -2.692517 | 2.759286  | -2.411197 | H | 2.196373  | 6.552325  | 0.474097  |
| C | -2.422672 | 4.117580  | -2.596568 | C | 2.820290  | 0.512939  | 3.167926  |
| H | -2.210017 | 4.482757  | -3.594206 | H | 2.704486  | -0.035073 | 2.231603  |
| C | -2.427875 | 5.003328  | -1.529828 | C | 4.312827  | 0.459294  | 3.534723  |
| H | -2.231512 | 6.056401  | -1.695799 | H | 4.940994  | 0.838667  | 2.728182  |
| C | -2.645284 | 4.530831  | -0.241627 | H | 4.617615  | -0.571110 | 3.736361  |
| H | -2.605670 | 5.220892  | 0.591591  | H | 4.509372  | 1.054402  | 4.431224  |
| C | -2.892999 | 3.179163  | -0.001621 | C | 1.981106  | -0.212177 | 4.225253  |
| C | -2.654389 | 1.817532  | -3.601848 | H | 2.161119  | 0.183252  | 5.228856  |
| H | -3.020659 | 0.848782  | -3.268524 | H | 2.239567  | -1.273241 | 4.238520  |
| C | -3.551438 | 2.286468  | -4.758124 | H | 0.915192  | -0.129077 | 4.009040  |
| H | -3.182368 | 3.216030  | -5.199851 | C | 3.048757  | -2.143200 | -1.224128 |
| H | -4.580875 | 2.461426  | -4.435150 | C | 2.602450  | -2.535453 | -2.498974 |

|   |           |           |           |   |           |           |           |
|---|-----------|-----------|-----------|---|-----------|-----------|-----------|
| C | 2.353218  | -3.891890 | -2.726501 | H | -6.701463 | 1.448744  | -1.399664 |
| H | 2.000509  | -4.206347 | -3.701485 | H | -5.357038 | 2.290012  | -2.202391 |
| C | 2.556168  | -4.836011 | -1.733752 | H | -5.889269 | 2.804438  | -0.608638 |
| H | 2.357784  | -5.883687 | -1.929186 | C | -5.559793 | -2.214247 | 1.362168  |
| C | 3.005732  | -4.435397 | -0.481159 | H | -5.133875 | -3.203828 | 1.204459  |
| H | 3.155981  | -5.179864 | 0.289223  | H | -6.551981 | -2.173418 | 0.915191  |
| C | 3.257089  | -3.092985 | -0.197229 | H | -5.665333 | -2.076522 | 2.441409  |
| C | 2.426065  | -1.551978 | -3.643720 | C | -2.964357 | 2.034509  | -1.750318 |
| H | 2.725267  | -0.569969 | -3.284843 | C | -2.692236 | 3.389729  | -1.494875 |
| C | 0.960967  | -1.448434 | -4.085693 | C | -2.199104 | 4.175838  | -2.538549 |
| H | 0.862341  | -0.690780 | -4.868056 | H | -1.981612 | 5.221512  | -2.355755 |
| H | 0.304758  | -1.178540 | -3.259579 | C | -1.964553 | 3.639759  | -3.795460 |
| H | 0.612380  | -2.401450 | -4.497364 | H | -1.572225 | 4.264274  | -4.589789 |
| C | 3.321548  | -1.914346 | -4.841754 | C | -2.222754 | 2.295361  | -4.029825 |
| H | 3.269290  | -1.128162 | -5.600210 | H | -2.033666 | 1.881285  | -5.012403 |
| H | 2.994318  | -2.846551 | -5.310376 | C | -2.722443 | 1.470138  | -3.022090 |
| H | 4.366850  | -2.042671 | -4.552543 | C | -2.891986 | 4.017090  | -0.125681 |
| C | 3.783847  | -2.686653 | 1.175295  | H | -3.236660 | 3.236741  | 0.551053  |
| H | 3.347433  | -1.714419 | 1.409593  | C | -1.563666 | 4.553548  | 0.430510  |
| C | 5.315094  | -2.515169 | 1.181506  | H | -1.704316 | 4.946870  | 1.440424  |
| H | 5.644297  | -1.683010 | 0.563031  | H | -1.174040 | 5.363813  | -0.192286 |
| H | 5.802633  | -3.426768 | 0.823832  | H | -0.806609 | 3.772414  | 0.476104  |
| H | 5.664806  | -2.322759 | 2.199483  | C | -3.949878 | 5.132041  | -0.157828 |
| C | 3.394532  | -3.661516 | 2.295639  | H | -4.899869 | 4.775826  | -0.561461 |
| H | 3.632163  | -3.214899 | 3.264725  | H | -3.621742 | 5.970194  | -0.779220 |
| H | 3.961645  | -4.594412 | 2.225446  | H | -4.129286 | 5.515033  | 0.850792  |
| H | 2.332273  | -3.896826 | 2.281764  | C | -3.047252 | 0.013685  | -3.321689 |
| C | 0.293266  | -1.360105 | 1.324621  | H | -3.135810 | -0.501484 | -2.365732 |
| O | 1.394607  | 1.400680  | -2.001771 | C | -4.404680 | -0.109550 | -4.035916 |
| O | -1.550705 | -1.213222 | -2.118802 | H | -4.644308 | -1.160760 | -4.219501 |
| C | 2.286455  | 1.991504  | -2.909901 | H | -4.383576 | 0.408215  | -4.999475 |
| H | 1.816936  | 2.037462  | -3.900386 | H | -5.213107 | 0.319400  | -3.442273 |
| H | 2.546735  | 3.019365  | -2.619609 | C | -1.949610 | -0.692886 | -4.126049 |
| H | 3.230320  | 1.438285  | -3.014144 | H | -1.000445 | -0.684348 | -3.588806 |
| C | -2.483151 | -1.692552 | -3.052833 | H | -1.799914 | -0.234172 | -5.106865 |
| H | -2.169361 | -1.410698 | -4.066351 | H | -2.228318 | -1.735233 | -4.297294 |
| H | -2.546229 | -2.789752 | -3.024559 | C | -2.765941 | -2.468722 | 1.337839  |
| H | -3.498520 | -1.302900 | -2.897228 | C | -2.626111 | -2.735557 | 2.712382  |

**X = NMe<sub>2</sub>**

Imaginary frequencies: 0

Electronic Energy = -7001.72573885 a.u.

ZPVE correction = 1.450214 a.u.

|    |           |           |           |
|----|-----------|-----------|-----------|
| Ga | -2.130133 | 0.331609  | 0.560306  |
| Ga | 2.071390  | -0.470898 | 0.425282  |
| Si | -0.118714 | -0.332338 | -0.638652 |
| O  | 0.256026  | 2.402517  | -1.648673 |
| N  | -3.456030 | 1.171438  | -0.711277 |
| N  | -3.351502 | -1.236296 | 0.887915  |
| N  | 3.348701  | -1.079909 | -1.030580 |
| N  | 3.351742  | 0.987651  | 0.995946  |
| C  | -4.766293 | 0.991622  | -0.566104 |
| C  | -5.328561 | -0.032243 | 0.210021  |
| H  | -6.407631 | -0.045470 | 0.261898  |
| C  | -4.675259 | -1.125188 | 0.797870  |
| C  | -5.736191 | 1.930216  | -1.248205 |

|   |           |           |           |
|---|-----------|-----------|-----------|
| H | -6.701463 | 1.448744  | -1.399664 |
| H | -5.357038 | 2.290012  | -2.202391 |
| H | -5.889269 | 2.804438  | -0.608638 |
| C | -5.559793 | -2.214247 | 1.362168  |
| H | -5.133875 | -3.203828 | 1.204459  |
| H | -6.551981 | -2.173418 | 0.915191  |
| H | -5.665333 | -2.076522 | 2.441409  |
| C | -2.964357 | 2.034509  | -1.750318 |
| C | -2.692236 | 3.389729  | -1.494875 |
| C | -2.199104 | 4.175838  | -2.538549 |
| H | -1.981612 | 5.221512  | -2.355755 |
| C | -1.964553 | 3.639759  | -3.795460 |
| H | -1.572225 | 4.264274  | -4.589789 |
| C | -2.222754 | 2.295361  | -4.029825 |
| H | -2.033666 | 1.881285  | -5.012403 |
| C | -2.722443 | 1.470138  | -3.022090 |
| C | -2.891986 | 4.017090  | -0.125681 |
| H | -3.236660 | 3.236741  | 0.551053  |
| C | -1.563666 | 4.553548  | 0.430510  |
| H | -1.704316 | 4.946870  | 1.440424  |
| H | -1.174040 | 5.363813  | -0.192286 |
| H | -0.806609 | 3.772414  | 0.476104  |
| C | -3.949878 | 5.132041  | -0.157828 |
| H | -4.899869 | 4.775826  | -0.561461 |
| H | -3.621742 | 5.970194  | -0.779220 |
| H | -4.129286 | 5.515033  | 0.850792  |
| C | -3.047252 | 0.013685  | -3.321689 |
| H | -3.135810 | -0.501484 | -2.365732 |
| C | -4.404680 | -0.109550 | -4.035916 |
| H | -4.644308 | -1.160760 | -4.219501 |
| H | -4.383576 | 0.408215  | -4.999475 |
| H | -5.213107 | 0.319400  | -3.442273 |
| C | -1.949610 | -0.692886 | -4.126049 |
| H | -1.000445 | -0.684348 | -3.588806 |
| H | -1.799914 | -0.234172 | -5.106865 |
| H | -2.228318 | -1.735233 | -4.297294 |
| C | -2.765941 | -2.468722 | 1.337839  |
| C | -2.626111 | -2.735557 | 2.712382  |
| C | -2.037225 | -3.942989 | 3.096832  |
| H | -1.915995 | -4.160547 | 4.151324  |
| C | -1.599463 | -4.861374 | 2.154971  |
| H | -1.141758 | -5.791203 | 2.472596  |
| C | -1.736004 | -4.580716 | 0.801030  |
| H | -1.382075 | -5.298597 | 0.073442  |
| C | -2.312494 | -3.387211 | 0.365322  |
| C | -3.079707 | -1.756299 | 3.783405  |
| H | -3.623177 | -0.951113 | 3.291423  |
| C | -4.021057 | -2.410781 | 4.807522  |
| H | -3.496962 | -3.153540 | 5.414835  |
| H | -4.860939 | -2.915076 | 4.324065  |
| H | -4.421405 | -1.653948 | 5.487674  |
| C | -1.872758 | -1.120771 | 4.487982  |
| H | -1.261397 | -1.879321 | 4.984296  |
| H | -2.205100 | -0.404753 | 5.244626  |
| H | -1.250689 | -0.589889 | 3.770930  |
| C | -2.493225 | -3.110762 | -1.120990 |
| H | -2.461388 | -2.028529 | -1.248026 |
| C | -3.868432 | -3.589126 | -1.616758 |

|   |           |           |           |   |           |           |           |
|---|-----------|-----------|-----------|---|-----------|-----------|-----------|
| H | -3.981900 | -4.666540 | -1.463940 | H | 3.411566  | 0.152911  | 3.284154  |
| H | -3.976075 | -3.384528 | -2.685766 | C | 1.684247  | 0.249089  | 4.518031  |
| H | -4.684726 | -3.084227 | -1.099485 | H | 1.947890  | -0.644986 | 5.089221  |
| C | -1.374991 | -3.695050 | -1.988071 | H | 0.995458  | -0.044210 | 3.730331  |
| H | -0.397046 | -3.331606 | -1.675942 | H | 1.163800  | 0.936749  | 5.190112  |
| H | -1.514324 | -3.394509 | -3.027177 | C | 3.932226  | 1.256245  | 5.047665  |
| H | -1.362013 | -4.788123 | -1.964851 | H | 4.252600  | 0.352056  | 5.573097  |
| C | 4.663869  | -0.982118 | -0.877873 | H | 3.471265  | 1.920302  | 5.783852  |
| C | 5.268767  | -0.188340 | 0.109158  | H | 4.819851  | 1.760947  | 4.661265  |
| H | 6.345756  | -0.252021 | 0.169950  | C | 2.986651  | 3.432449  | -0.536618 |
| C | 4.668399  | 0.775373  | 0.928344  | H | 2.718923  | 2.484811  | -1.005901 |
| C | 5.597285  | -1.760639 | -1.777369 | C | 4.501631  | 3.627701  | -0.742693 |
| H | 5.775225  | -2.747636 | -1.341959 | H | 5.079445  | 2.754219  | -0.450553 |
| H | 6.557575  | -1.253555 | -1.865079 | H | 4.860146  | 4.489416  | -0.172128 |
| H | 5.175717  | -1.911237 | -2.769215 | H | 4.708150  | 3.814273  | -1.800292 |
| C | 5.609535  | 1.589637  | 1.789378  | C | 2.250081  | 4.557935  | -1.276149 |
| H | 5.714857  | 1.095558  | 2.759028  | H | 2.407200  | 4.448450  | -2.351781 |
| H | 5.237418  | 2.594957  | 1.972215  | H | 2.639723  | 5.539133  | -0.988092 |
| H | 6.596494  | 1.648597  | 1.332293  | H | 1.177740  | 4.539620  | -1.095001 |
| C | 2.797087  | -1.769731 | -2.163131 | C | 0.106186  | 1.365592  | -1.160167 |
| C | 2.612303  | -3.162828 | -2.135128 | C | 3.321617  | -2.309956 | 2.339657  |
| C | 2.017087  | -3.775929 | -3.241956 | H | 3.362518  | -2.166505 | 3.433463  |
| H | 1.860979  | -4.848308 | -3.232126 | H | 3.419864  | -3.395993 | 2.166516  |
| C | 1.615226  | -3.036948 | -4.343206 | H | 4.203367  | -1.830675 | 1.910959  |
| H | 1.148783  | -3.529028 | -5.188986 | C | -3.348510 | 1.729232  | 2.806053  |
| C | 1.806035  | -1.659633 | -4.357661 | H | -3.519773 | 2.820569  | 2.783501  |
| H | 1.482015  | -1.089042 | -5.217847 | H | -4.220078 | 1.254931  | 2.350243  |
| C | 2.392694  | -1.001855 | -3.277352 | H | -3.329095 | 1.439915  | 3.870214  |
| C | 3.029797  | -4.018368 | -0.949635 | N | 2.104904  | -1.782592 | 1.766890  |
| H | 3.502748  | -3.366624 | -0.216373 | N | -2.131038 | 1.356642  | 2.123637  |
| C | 1.809233  | -4.653374 | -0.270072 | C | -0.958602 | 1.966677  | 2.704663  |
| H | 1.301497  | -5.349145 | -0.943861 | H | -1.025350 | 3.063630  | 2.724506  |
| H | 1.093254  | -3.893908 | 0.035825  | H | -0.798148 | 1.643238  | 3.744257  |
| H | 2.113505  | -5.208929 | 0.621108  | H | -0.063848 | 1.708417  | 2.136720  |
| C | 4.040144  | -5.104556 | -1.355109 | C | 0.926000  | -2.406782 | 2.319113  |
| H | 4.400624  | -5.635893 | -0.469730 | H | 0.019717  | -2.024210 | 1.847173  |
| H | 4.902144  | -4.684300 | -1.876968 | H | 0.928315  | -3.495689 | 2.176374  |
| H | 3.581883  | -5.842198 | -2.019617 | H | 0.827577  | -2.232621 | 3.400950  |
| C | 2.610730  | 0.504083  | -3.306763 |   |           |           |           |
| H | 2.478887  | 0.861329  | -2.283884 |   |           |           |           |
| C | 4.048603  | 0.864736  | -3.720763 |   |           |           |           |
| H | 4.786246  | 0.476657  | -3.019689 |   |           |           |           |
| H | 4.166925  | 1.951306  | -3.756729 |   |           |           |           |
| H | 4.274032  | 0.464451  | -4.713569 |   |           |           |           |
| C | 1.612892  | 1.251784  | -4.197974 |   |           |           |           |
| H | 1.801411  | 1.059410  | -5.258250 |   |           |           |           |
| H | 1.707747  | 2.327097  | -4.036024 |   |           |           |           |
| H | 0.582443  | 0.976816  | -3.975856 |   |           |           |           |
| C | 2.854751  | 2.149616  | 1.686377  |   |           |           |           |
| C | 2.604659  | 2.105566  | 3.070558  |   |           |           |           |
| C | 2.054747  | 3.233605  | 3.686013  |   |           |           |           |
| H | 1.843218  | 3.205834  | 4.748398  |   |           |           |           |
| C | 1.773162  | 4.379612  | 2.961518  |   |           |           |           |
| H | 1.334544  | 5.241513  | 3.451116  |   |           |           |           |
| C | 2.063690  | 4.425098  | 1.602901  |   |           |           |           |
| H | 1.854335  | 5.330927  | 1.050945  |   |           |           |           |
| C | 2.614194  | 3.327445  | 0.939604  |   |           |           |           |
| C | 2.942502  | 0.895048  | 3.926387  |   |           |           |           |

## V. References

- [1] N. J. Hardman, B. E. Eichler and P. P. Power, *Chem. Commun.* 2000, **20**, 1991-1992.
- [2] C. Ganesamoorthy, J. Schoening, C. Wölper, L. Song, P. R. Schreiner and S. Schulz, *Nat. Chem.* 2020, **12**, 608–614.
- [3] A. C. Filippou, Y. N. Lebedev, O. Chernov, M. Straßmann and G. Schnakenburg, *Angew. Chem.* 2013, **125**, 7112-7116; *Angew. Chem. Int. Ed.* 2013, **52**, 6974-6978.
- [4] R. K. Harris, E. D. Becker, S. M. Cabral de Menezes, R. Goodfellow and P. Granger, *Magn. Reson. Chem.* 2002, **40**, 489-505.
- [5] G. M. Sheldrick, *Acta Crystallogr.* 1990, **A46**, 467.
- [6] G. M. Sheldrick, SHELXL-2017, Program for the Refinement of Crystal Structures University of Göttingen, Göttingen (Germany) 2017. See also: G. M. Sheldrick, *Acta Cryst.*, 2015, **C71**, 3-8.
- [7] C. B. Hübschle, G. M. Sheldrick and B. Dittrich, *J. Appl. Cryst.* 2011, **44**, 1281-1284.
- [8] C. Hansch, A. Leo and R. W. Taft, *Chem. Rev.* 1991, **91**, 165-195.
- [9] (a) M. Charton, in *Progress in Physical Organic Chemistry*, ed. R. W. Taft, John Wiley & Sons, Inc., 1981, vol. 13, pp. 119-251; (b) P. J. Taylor and A. R. Wait, *J. Chem. Soc., Perkin Trans. 2*, 1986, 1765-1770.
